# Supplementary material for: Study of the hydrogen absorption behaviour of a “number-sensitive” Mg atom: ultra-high hydrogen storage in MgHn (n = 1–20) clusters
Source: Royal Society of Chemistry journal article supplement (doi:10.1039/d3ta01699d), 2023-01-01
Supplement: d3ta01699d1.pdf [file d3ta01699d1.pdf]

## Supplementary Materials

### Study of the hydrogen absorption behavior of "number-sensitive" Mg atom: ultra-high hydrogen storage in $\text{MgH}_n$ ( $n=1-20$ ) clusters

Ben-Chao Zhu <sup>1</sup>, Guang-Hui Liu <sup>2</sup>, Ping-Ji Deng <sup>1</sup>, Chun-Jing Liu <sup>1</sup>, Yan-Hua Liao <sup>3\*</sup>, Lu Zeng <sup>4\*</sup>, and Jun Zhao <sup>1\*</sup>

<sup>1</sup>School of Public Health, Hubei University of Medicine, Shiyan 442000, China

<sup>2</sup>Daye Special Steel Co., Ltd, Huangshi 435100, P.R China

<sup>3</sup>School of Mathematics and Physics, Hubei Polytechnic University, Huangshi 435003, China

<sup>4</sup>College of Materials Science and Engineering, Chongqing University, Chongqing 400044, China

| Table of Contents                                                                                                                                                                                                                             | Pages |
|-----------------------------------------------------------------------------------------------------------------------------------------------------------------------------------------------------------------------------------------------|-------|
| <b>Table S1.</b> Cartesian coordinates for all optimized $\text{MgH}_n$ ( $n=1-20$ ) clusters.                                                                                                                                                | 2–47  |
| <b>Table S2.</b> $E_{\text{gap}}$ for $\beta$ -electrons, HOMO and LUMO energy of Molecular Orbitals (MOs) for all optimized $\text{MgH}_n$ ( $n=1-20$ ) clusters.                                                                            | 10–47 |
| <b>Table S3.</b> The atom distance in three kinds Mg-H interaction for all optimized $\text{MgH}_n$ ( $n=1-20$ ) clusters.                                                                                                                    | 11–47 |
| <b>Table S4.</b> ADCH analysis on Mg and H atoms in all optimized $\text{MgH}_n$ ( $n=1-20$ ) clusters.                                                                                                                                       | 12–47 |
| <b>Table S5.</b> Topological analysis for all optimized $\text{MgH}_n$ ( $n=1-20$ ) clusters, including connecting atoms and numbering of critical points (CPs) bonding, electron density, Laplacian electron density, ELF and atom distance. | 14–47 |
| <b>Figure S1.</b> HOMO and LUMO molecular orbital energy of $\text{MgH}_n$ ( $n=1-2$ ) clusters.                                                                                                                                              | 26–47 |
| <b>Figure S2.</b> TDOS, PDOS and mol MOs diagram of $\text{MgH}_n$ ( $n=1-20$ ) clusters.                                                                                                                                                     | 27–47 |
| <b>Figure S3.</b> ADCH, BCP, IRI-2D and IRI-3D analysis for $\text{MgH}_n$ ( $n=1-20$ ) clusters.                                                                                                                                             | 37–47 |

**Table S1.** Cartesian coordinates for all optimized MgH<sub>n</sub> (n=1-20) clusters.

| MgH <sub>1</sub> : Charge =0, Multiplicity =2, b3pw91/6-311+g(d) |            |            |             |
|------------------------------------------------------------------|------------|------------|-------------|
| Atom                                                             | X          | Y          | Z           |
| Mg                                                               | 0.00000000 | 0.00000000 | 0.13476500  |
| H                                                                | 0.00000000 | 0.00000000 | -1.61717800 |

| MgH <sub>2</sub> : Charge =0, Multiplicity =1, b3pw91/6-311+g(d) |            |            |             |
|------------------------------------------------------------------|------------|------------|-------------|
| Atom                                                             | X          | Y          | Z           |
| Mg                                                               | 0.00000000 | 0.00000000 | 0.00000000  |
| H                                                                | 0.00000000 | 0.00000000 | -1.71252500 |
| H                                                                | 0.00000000 | 0.00000000 | 1.71252800  |

| MgH <sub>3</sub> : Charge =0, Multiplicity =1, b3pw91/6-311+g(d) |             |             |            |
|------------------------------------------------------------------|-------------|-------------|------------|
| Atom                                                             | X           | Y           | Z          |
| Mg                                                               | -0.10722700 | -0.00001700 | 0.00000100 |
| H                                                                | 1.54754700  | -0.77515700 | 0.00000200 |
| H                                                                | -1.80834500 | 0.00009700  | 0.00000400 |
| H                                                                | 1.54752200  | 0.77526800  | 0.00000200 |

| MgH <sub>4</sub> : Charge =0, Multiplicity =1, b3pw91/6-311+g(d) |             |             |             |
|------------------------------------------------------------------|-------------|-------------|-------------|
| Atom                                                             | X           | Y           | Z           |
| Mg                                                               | 0.35808100  | -0.00085600 | -0.00007100 |
| H                                                                | 0.38392300  | -1.71363600 | -0.00029600 |
| H                                                                | 0.40722300  | 1.71137100  | 0.00111600  |
| H                                                                | -2.54866600 | 0.37939500  | -0.00322900 |
| H                                                                | -2.53944900 | -0.36686000 | 0.00325500  |

| MgH <sub>5</sub> : Charge =0, Multiplicity =1, b3pw91/6-311+g(d) |           |           |           |
|------------------------------------------------------------------|-----------|-----------|-----------|
| Atom                                                             | X         | Y         | Z         |
| Mg                                                               | -0.307681 | -0.066501 | -0.000004 |
| H                                                                | -0.729236 | -1.716206 | 0.000030  |
| H                                                                | 2.279210  | 0.051555  | 0.000173  |
| H                                                                | 2.199997  | -0.692446 | -0.000110 |
| H                                                                | -0.028995 | 1.577583  | 0.747766  |
| H                                                                | -0.028802 | 1.577528  | -0.747815 |

| MgH <sub>6</sub> : Charge =0, Multiplicity =1, b3pw91/6-311+g(d) |           |           |           |
|------------------------------------------------------------------|-----------|-----------|-----------|
| Atom                                                             | X         | Y         | Z         |
| Mg                                                               | -0.000239 | 0.000000  | -0.000071 |
| H                                                                | 3.129896  | 0.37269   | 0.000244  |
| H                                                                | -0.000398 | 1.713021  | -0.000063 |
| H                                                                | 3.129897  | -0.372691 | 0.000247  |
| H                                                                | -0.000400 | -1.713021 | -0.000064 |

|   |           |           |          |
|---|-----------|-----------|----------|
| H | -3.128061 | 0.372694  | 0.000245 |
| H | -3.128061 | -0.372693 | 0.000246 |

| MgH <sub>7</sub> : Charge =0, Multiplicity =1, b3pw91/6-311+g(d) |           |           |           |
|------------------------------------------------------------------|-----------|-----------|-----------|
| Atom                                                             | X         | Y         | Z         |
| Mg                                                               | -0.916618 | -0.214616 | -0.056496 |
| H                                                                | 0.885796  | 1.373121  | 0.907012  |
| H                                                                | 6.066469  | -0.494451 | -0.240868 |
| H                                                                | 1.148997  | 0.726752  | 1.176633  |
| H                                                                | -0.519051 | -1.788640 | 0.457024  |
| H                                                                | 6.247561  | 0.214434  | -0.374007 |
| H                                                                | -1.826892 | 1.369301  | -0.007415 |
| H                                                                | -1.003459 | 1.174872  | -1.240430 |

| MgH <sub>8</sub> : Charge =0, Multiplicity =1, b3pw91/6-311+g(d) |           |           |           |
|------------------------------------------------------------------|-----------|-----------|-----------|
| Atom                                                             | X         | Y         | Z         |
| Mg                                                               | 0.011039  | -0.015617 | -0.000273 |
| H                                                                | 0.012663  | -0.011233 | -1.713578 |
| H                                                                | 2.789391  | -1.502382 | 0.373292  |
| H                                                                | 2.790676  | -1.500688 | -0.372025 |
| H                                                                | 0.007551  | -0.019476 | 1.713038  |
| H                                                                | -0.029512 | 3.120948  | -0.370512 |
| H                                                                | -0.030789 | 3.121588  | 0.37485   |
| H                                                                | -2.83793  | -1.510826 | -0.373463 |
| H                                                                | -2.834523 | -1.510528 | 0.371671  |

| MgH <sub>9</sub> : Charge =0, Multiplicity =1, b3pw91/6-311+g(d) |           |           |           |
|------------------------------------------------------------------|-----------|-----------|-----------|
| Atom                                                             | X         | Y         | Z         |
| Mg                                                               | -1.37192  | -0.177863 | -0.174708 |
| H                                                                | -0.884259 | -1.926705 | -0.384561 |
| H                                                                | -0.161644 | 0.075296  | 2.094688  |
| H                                                                | 3.355822  | 3.980604  | -0.298449 |
| H                                                                | 0.245454  | -0.490277 | 1.822433  |
| H                                                                | -2.424256 | 1.097228  | 0.232781  |
| H                                                                | 7.040698  | -1.850179 | 0.015606  |
| H                                                                | 2.780413  | 4.437596  | -0.183806 |
| H                                                                | 6.446356  | -2.241312 | -0.200641 |
| H                                                                | 0.064456  | -0.947899 | -1.001560 |

| MgH <sub>10</sub> : Charge =0, Multiplicity =1, b3pw91/6-311+g(d) |           |          |          |
|-------------------------------------------------------------------|-----------|----------|----------|
| Atom                                                              | X         | Y        | Z        |
| Mg                                                                | -0.001835 | 0.018277 | 0        |
| H                                                                 | -0.002403 | 0.025566 | 1.714007 |

|   |           |           |           |
|---|-----------|-----------|-----------|
| H | -2.305117 | 2.16316   | 0.372656  |
| H | -2.305096 | 2.163183  | -0.372657 |
| H | 2.096007  | -2.211896 | -0.372802 |
| H | 2.324993  | 2.132323  | 0.372673  |
| H | 2.096003  | -2.211899 | 0.372798  |
| H | -2.102488 | -2.218849 | -0.372797 |
| H | -2.10249  | -2.218844 | 0.372783  |
| H | 2.324989  | 2.132339  | -0.372658 |
| H | -0.002377 | 0.025597  | -1.714007 |

| MgH <sub>11</sub> : Charge =0, Multiplicity =1, b3pw91/6-311+g(d) |           |           |           |
|-------------------------------------------------------------------|-----------|-----------|-----------|
| Atom                                                              | X         | Y         | Z         |
| Mg                                                                | 1.261721  | 0.973041  | 0.139146  |
| H                                                                 | 0.701410  | -2.699303 | -0.074631 |
| H                                                                 | 0.359869  | -2.105043 | 1.254799  |
| H                                                                 | -4.331300 | 3.725465  | 1.475292  |
| H                                                                 | -7.563002 | -0.547467 | -0.860410 |
| H                                                                 | -3.765866 | 4.006758  | 1.867939  |
| H                                                                 | -0.888041 | 0.042065  | -0.868109 |
| H                                                                 | -7.411321 | -0.992705 | -1.436388 |
| H                                                                 | 3.351673  | 4.847624  | -1.002952 |
| H                                                                 | 2.129097  | 0.434747  | -0.267476 |
| H                                                                 | -1.176011 | -0.612149 | -0.647061 |
| H                                                                 | 3.452844  | 5.576503  | -1.110760 |

| MgH <sub>12</sub> : Charge =0, Multiplicity =1, b3pw91/6-311+g(d) |           |           |           |
|-------------------------------------------------------------------|-----------|-----------|-----------|
| Atom                                                              | X         | Y         | Z         |
| Mg                                                                | 0.009818  | -0.000516 | -0.000002 |
| H                                                                 | 0.139146  | 3.131856  | -0.372530 |
| H                                                                 | -0.074631 | 3.131799  | 0.372729  |
| H                                                                 | 1.254799  | -2.381898 | 0.372680  |
| H                                                                 | 1.475292  | 1.184752  | 0.372624  |
| H                                                                 | -0.860410 | 0.750929  | 0.372483  |
| H                                                                 | 1.867939  | 0.750923  | -0.372668 |
| H                                                                 | -0.868109 | 1.184737  | -0.372737 |
| H                                                                 | -1.436388 | -2.682071 | -0.372552 |
| H                                                                 | -1.002952 | -2.682042 | 0.372660  |
| H                                                                 | -0.267476 | -0.000439 | -1.714456 |
| H                                                                 | -0.647061 | -2.381906 | -0.372660 |
| H                                                                 | -1.110760 | -0.000446 | 1.714453  |

| MgH <sub>13</sub> : Charge =0, Multiplicity =1, b3pw91/6-311+g(d) |   |   |   |
|-------------------------------------------------------------------|---|---|---|
| Atom                                                              | X | Y | Z |

|    |           |           |           |
|----|-----------|-----------|-----------|
| Mg | 0.424306  | -0.150039 | -0.249728 |
| H  | 0.186754  | 3.706821  | 3.620501  |
| H  | 0.549371  | -2.189191 | -1.829874 |
| H  | -0.195414 | -2.121651 | -1.807412 |
| H  | -1.267734 | -0.536908 | 0.322655  |
| H  | -5.768980 | 2.946357  | -2.766643 |
| H  | 0.922918  | 3.657623  | 3.526850  |
| H  | -4.607116 | -3.462092 | 3.236757  |
| H  | -1.216350 | 0.381628  | -0.854473 |
| H  | 2.123560  | -0.114287 | -0.148112 |
| H  | 7.177956  | -0.050847 | -0.342902 |
| H  | -5.179851 | 2.575524  | -2.505005 |
| H  | -4.253157 | -2.949073 | 2.831067  |
| H  | 6.436373  | -0.043431 | -0.286673 |

| MgH <sub>14</sub> : Charge =0, Multiplicity =1, b3pw91/6-311+g(d) |           |           |           |
|-------------------------------------------------------------------|-----------|-----------|-----------|
| Atom                                                              | X         | Y         | Z         |
| Mg                                                                | 0.451309  | -0.005033 | -0.071942 |
| H                                                                 | 0.548805  | -2.846436 | -1.374904 |
| H                                                                 | -1.226521 | 0.004643  | 0.280846  |
| H                                                                 | -0.181156 | -2.844248 | -1.224109 |
| H                                                                 | 0.194911  | 0.330283  | -3.159559 |
| H                                                                 | 0.705508  | 3.06529   | -0.764368 |
| H                                                                 | 2.130685  | -0.012357 | -0.416296 |
| H                                                                 | -0.024286 | 3.070599  | -0.613338 |
| H                                                                 | -0.535322 | 0.334099  | -3.009932 |
| H                                                                 | 0.558239  | -2.112643 | 2.311987  |
| H                                                                 | 1.387662  | 1.573204  | 2.555563  |
| H                                                                 | 1.287562  | -2.114371 | 2.158988  |
| H                                                                 | 0.658431  | 1.577976  | 2.708603  |
| H                                                                 | -5.831085 | 0.017309  | 0.731271  |
| H                                                                 | -5.089136 | 0.017048  | 0.678554  |

| MgH <sub>15</sub> : Charge =0, Multiplicity =1, b3pw91/6-311+g(d) |           |           |           |
|-------------------------------------------------------------------|-----------|-----------|-----------|
| Atom                                                              | X         | Y         | Z         |
| Mg                                                                | -0.618196 | 0.009328  | -0.088668 |
| H                                                                 | -2.215248 | 4.471749  | 2.640196  |
| H                                                                 | 0.052394  | -1.934521 | -1.651486 |
| H                                                                 | 0.724607  | -1.610910 | -1.595119 |
| H                                                                 | 0.765729  | 1.079814  | -0.616968 |
| H                                                                 | 5.740018  | 0.897623  | 3.525660  |
| H                                                                 | -2.854643 | 4.092424  | 2.619851  |
| H                                                                 | 4.019754  | -5.696151 | -0.020941 |

|   |           |           |           |
|---|-----------|-----------|-----------|
| H | 3.036629  | 4.265419  | -4.207941 |
| H | 1.070580  | 0.230870  | 0.573973  |
| H | -2.227197 | -0.547398 | -0.073205 |
| H | -6.82318  | -2.656488 | 0.059357  |
| H | 5.134193  | 0.814675  | 3.102411  |
| H | 2.812702  | 3.890048  | -3.606267 |
| H | 4.342804  | -5.090679 | 0.265549  |
| H | -6.160794 | -2.318407 | 0.048945  |

MgH<sub>16</sub>: Charge =0, Multiplicity =1, b3pw91/6-311+g(d)

| Atom | X          | Y         | Z         |
|------|------------|-----------|-----------|
| Mg   | -0.2691160 | -0.633678 | 0.157481  |
| H    | 1.9828020  | -2.752838 | -0.795179 |
| H    | -3.279670  | -0.471320 | 0.920267  |
| H    | -4.793070  | 5.2081950 | -1.033721 |
| H    | -3.333374  | -0.100669 | 0.275752  |
| H    | -4.277937  | 4.9396750 | -1.498017 |
| H    | -1.753657  | -2.927794 | -1.476222 |
| H    | 1.934936   | -2.384049 | -1.440778 |
| H    | -0.378877  | 0.212189  | -1.329806 |
| H    | 7.719314   | 2.381830  | -0.352457 |
| H    | -0.151285  | -1.488176 | 1.639152  |
| H    | 2.589978   | 0.450862  | 0.998201  |
| H    | 7.491517   | 2.995377  | -0.705527 |
| H    | -1.704859  | -3.298451 | -0.831592 |
| H    | -0.656653  | 1.826929  | 2.017846  |
| H    | -0.706070  | 2.191800  | 1.369685  |
| H    | 2.546300   | 0.820580  | 0.352630  |

MgH<sub>17</sub>: Charge =0, Multiplicity =1, b3pw91/6-311+g(d)

| Atom | X         | Y         | Z         |
|------|-----------|-----------|-----------|
| Mg   | -0.166296 | -0.432046 | 0.432046  |
| H    | 0.442218  | -5.420898 | -5.420898 |
| H    | -0.522455 | 1.758792  | 1.758792  |
| H    | 0.224857  | 1.739864  | 1.739864  |
| H    | 1.463157  | -0.771211 | -0.771211 |
| H    | 6.155743  | 1.241572  | 1.241572  |
| H    | -0.296533 | -5.338601 | -5.338601 |
| H    | 1.734039  | 6.521918  | 6.521918  |
| H    | 4.870929  | -2.305341 | -2.305341 |
| H    | 1.530359  | 0.004386  | 0.004386  |
| H    | -1.849755 | -0.601104 | -0.601104 |
| H    | -6.753157 | -1.680698 | -1.680698 |

|   |           |           |           |
|---|-----------|-----------|-----------|
| H | 5.592304  | 1.021646  | 1.021646  |
| H | 4.505281  | -2.127732 | -2.127732 |
| H | 2.264952  | 6.04275   | 6.04275   |
| H | -6.029806 | -1.542599 | -1.542599 |
| H | -5.743731 | 3.660309  | 3.660309  |
| H | -5.592846 | 2.981502  | 2.981502  |

| MgH <sub>18</sub> : Charge =0, Multiplicity =1, b3pw91/6-311+g(d) |           |           |           |
|-------------------------------------------------------------------|-----------|-----------|-----------|
| Atom                                                              | X         | Y         | Z         |
| Mg                                                                | 0.008821  | -0.901872 | -0.000966 |
| H                                                                 | -2.144166 | 4.267395  | 3.120445  |
| H                                                                 | -4.627300 | 3.589189  | -1.803425 |
| H                                                                 | 1.126595  | 1.251002  | -1.908472 |
| H                                                                 | -4.900703 | 3.982891  | -2.372029 |
| H                                                                 | -1.119232 | -1.472958 | -2.902868 |
| H                                                                 | -1.336806 | -0.004706 | 0.568517  |
| H                                                                 | 0.627901  | -2.422744 | 2.752438  |
| H                                                                 | -2.011652 | 4.932475  | 3.425723  |
| H                                                                 | 1.345565  | -1.814202 | -0.566649 |
| H                                                                 | -2.060502 | -3.413154 | 0.230545  |
| H                                                                 | -1.476988 | -3.805077 | -0.016231 |
| H                                                                 | -1.70417  | -1.080022 | -2.660298 |
| H                                                                 | 6.944535  | 3.094971  | -1.179336 |
| H                                                                 | 2.195083  | 0.669389  | 1.530741  |
| H                                                                 | 1.611148  | 1.063027  | 1.775284  |
| H                                                                 | 0.045085  | -2.030422 | 3.000683  |
| H                                                                 | 0.542135  | 1.642398  | -1.661443 |
| H                                                                 | 6.837617  | 2.373017  | -1.322038 |

| MgH <sub>19</sub> : Charge =0, Multiplicity =1, b3pw91/6-311+g(d) |           |           |           |
|-------------------------------------------------------------------|-----------|-----------|-----------|
| Atom                                                              | X         | Y         | Z         |
| Mg                                                                | 0.381415  | -0.511772 | 0.280508  |
| H                                                                 | -1.012696 | 1.664047  | 0.933782  |
| H                                                                 | -0.411017 | 4.61373   | -2.317474 |
| H                                                                 | -4.965546 | 2.254836  | -1.636239 |
| H                                                                 | 0.923098  | -1.132460 | 1.7703660 |
| H                                                                 | 0.434716  | 0.490852  | -1.247156 |
| H                                                                 | 2.653009  | 3.972960  | 2.139269  |
| H                                                                 | -4.456659 | -0.835148 | 2.534690  |
| H                                                                 | -2.597722 | -4.593108 | -0.682238 |
| H                                                                 | -4.327503 | -1.118163 | 1.859254  |
| H                                                                 | 2.810874  | 3.435318  | 2.628238  |
| H                                                                 | -0.803068 | 1.457949  | 1.620970  |

|   |           |           |           |
|---|-----------|-----------|-----------|
| H | 5.762797  | -1.016904 | -0.818603 |
| H | -0.745365 | -0.303031 | -1.142700 |
| H | 1.671682  | -2.501891 | -0.971333 |
| H | -0.347747 | 5.333760  | -2.142514 |
| H | 6.093785  | -1.389897 | -1.370269 |
| H | 1.594535  | -2.037317 | -1.551656 |
| H | -2.478902 | -4.008458 | -1.126272 |
| H | -4.375253 | 1.8541930 | -1.846216 |

| MgH <sub>20</sub> : Charge =0, Multiplicity =1, b3pw91/6-311+g(d) |           |           |           |
|-------------------------------------------------------------------|-----------|-----------|-----------|
| Atom                                                              | X         | Y         | Z         |
| Mg                                                                | -0.74248  | 0.046462  | -0.233081 |
| H                                                                 | 2.264489  | -0.714941 | -0.120017 |
| H                                                                 | -0.173987 | 1.391395  | -1.13154  |
| H                                                                 | -3.466897 | -0.360272 | -1.884114 |
| H                                                                 | 5.321264  | 2.282437  | 0.922460  |
| H                                                                 | 0.856294  | 6.174091  | -0.174467 |
| H                                                                 | -2.821568 | 2.141954  | 0.904384  |
| H                                                                 | 5.265501  | 2.085387  | 1.637340  |
| H                                                                 | 0.746847  | 5.509887  | -0.490747 |
| H                                                                 | -2.579906 | -4.236940 | 2.594193  |
| H                                                                 | -3.21615  | 0.225400  | -2.270535 |
| H                                                                 | 0.004920  | -1.553432 | -2.877570 |
| H                                                                 | 0.568346  | 1.554071  | 2.150523  |
| H                                                                 | -1.321749 | -1.299775 | 0.656642  |
| H                                                                 | 5.812074  | -4.174911 | -0.558938 |
| H                                                                 | 0.307178  | 0.975957  | 2.541990  |
| H                                                                 | -3.068663 | 1.551506  | 1.286125  |
| H                                                                 | 2.003196  | -1.299864 | 0.261115  |
| H                                                                 | -0.245615 | -2.139140 | -2.490906 |
| H                                                                 | -2.827094 | -4.823019 | 2.979842  |
| H                                                                 | 5.481283  | -3.847335 | -1.138807 |

The structural optimization calculation level is B3PW91/6-311G(d) [S1, S2] for this work is based on the previous similar research on Mg-based clusters and Mg-H clusters [S3-S7]. It is worthy to note that during optimization using Gaussian09, many isomers do not converge and always reported ‘‘Gaussian 1999 error’’, Due to the presence of a large number of H atoms in this cluster system, which interact weakly with Mg, we use the GIIDS method in structural optimization calculations where convergence is not possible



## Reference

- [S1] Becke, Axel D. "Density - functional thermochemistry. I. The effect of the exchange - only gradient correction." *The Journal of chemical physics* 96.3 (1992): 2155-2160.
- [S2] Frisch, Michael J., John A. Pople, and J. Stephen Binkley. "Self - consistent molecular orbital methods 25. Supplementary functions for Gaussian basis sets." *The Journal of chemical physics* 80.7 (1984): 3265-3269.
- [S3] Zhang, Lili, et al. "Structural evolution and hydrogen storage performance of Mg<sub>3</sub>LaH<sub>n</sub> (n= 9–20)." *International Journal of Hydrogen Energy* 47.12 (2022): 7884-7891.
- [S4] Chen, Hujie, et al. "MgScH<sub>15</sub>: a highly stable cluster for hydrogen storage." *International Journal of Hydrogen Energy* 45.56 (2020): 32260-32268.
- [S5] Xia, Xinxin, et al. "Deciphering the structural evolution and electronic properties of magnesium clusters: an aromatic homonuclear metal Mg<sub>17</sub> cluster." *The Journal of Physical Chemistry A* 120.40 (2016): 7947-7954.
- [S6] Belyaev, Sergey N., et al. "Structural, electronic, thermodynamic and spectral properties of Mg<sub>n</sub> (n= 2–31) clusters. A DFT study." *Computational and Theoretical Chemistry* 1079 (2016): 34-46.
- [S7] Liu, Ting, et al. "Investigating the structural and electronic properties of anionic calcium-doped magnesium clusters." *Journal of Molecular Structure* (2023): 135195.

**Table S2.**  $E_{\text{gap}}$  for  $\beta$ -electrons, HOMO and LUMO energy of Molecular Orbitals (MOs) for all optimized  $\text{MgH}_n$  ( $n=1-20$ ) clusters.

| Cluster           | $E_{\text{gap-}\beta}$ (eV) | HOMO- $\alpha$ (eV) | LUMO- $\alpha$ (eV) | HOMO- $\beta$ (eV) | LUMO- $\beta$ (eV) |
|-------------------|-----------------------------|---------------------|---------------------|--------------------|--------------------|
| MgH <sub>1</sub>  | 4.89                        | —                   | 1.44                | 1.44               | 3.68               |
| MgH <sub>2</sub>  | 6.48                        | 2.59                | 2.22                | 2.22               | 6.48               |
| MgH <sub>3</sub>  | 5.20                        | -3.77               | 1.61                | 1.61               | 4.74               |
| MgH <sub>4</sub>  | 6.23                        | 3.75                | 2.25                | 2.25               | 6.23               |
| MgH <sub>5</sub>  | 5.11                        | -3.74               | 1.88                | 1.88               | 4.98               |
| MgH <sub>6</sub>  | 6.34                        | 3.73                | 2.26                | 2.26               | 6.34               |
| MgH <sub>7</sub>  | 5.04                        | -3.72               | 2.00                | 2.00               | 5.50               |
| MgH <sub>8</sub>  | 6.62                        | 3.72                | 2.27                | 2.27               | 6.62               |
| MgH <sub>9</sub>  | 5.05                        | -3.71               | 2.06                | 2.06               | 5.49               |
| MgH <sub>10</sub> | 6.89                        | 3.71                | 2.27                | 2.27               | 6.89               |
| MgH <sub>11</sub> | 5.04                        | -3.70               | 2.10                | 2.10               | 5.51               |
| MgH <sub>12</sub> | 6.90                        | 3.70                | 2.27                | 2.27               | 6.90               |
| MgH <sub>13</sub> | 5.04                        | -3.70               | 2.13                | 2.13               | 5.51               |
| MgH <sub>14</sub> | 7.06                        | 3.70                | 2.27                | 2.27               | 7.06               |
| MgH <sub>15</sub> | 4.83                        | -3.70               | 2.15                | 2.15               | 5.77               |
| MgH <sub>16</sub> | 7.07                        | 3.70                | 2.27                | 2.27               | 7.07               |
| MgH <sub>17</sub> | 5.05                        | -3.70               | 2.17                | 2.17               | 5.50               |
| MgH <sub>18</sub> | 7.07                        | 3.70                | 2.27                | 2.27               | 7.07               |
| MgH <sub>19</sub> | 4.99                        | -3.70               | 2.18                | 2.18               | 5.56               |
| MgH <sub>20</sub> | 7.07                        | —                   | 2.28                | 2.28               | 7.07               |

**Table S3.** The atom distance in three kinds Mg-H interaction for all optimized MgH<sub>n</sub> (n=1-20) clusters.

| Clusters          | Mg-H attraction distance / Å |         |         | Mg-H VdW distance / Å |                   |                   |                   |                   | Mg-H no interaction distance / Å |                   |                   |                   |                   |                   |
|-------------------|------------------------------|---------|---------|-----------------------|-------------------|-------------------|-------------------|-------------------|----------------------------------|-------------------|-------------------|-------------------|-------------------|-------------------|
|                   | Mg-H                         | Mg-H    | Mg-H    | Mg-H <sub>2</sub>     | Mg-H <sub>2</sub> | Mg-H <sub>2</sub> | Mg-H <sub>2</sub> | Mg-H <sub>2</sub> | Mg-H <sub>2</sub>                | Mg-H <sub>2</sub> | Mg-H <sub>2</sub> | Mg-H <sub>2</sub> | Mg-H <sub>2</sub> | Mg-H <sub>2</sub> |
| MgH <sub>1</sub>  | 1.75200                      | —       | —       | —                     | —                 | —                 | —                 | —                 | —                                | —                 | —                 | —                 | —                 | —                 |
| MgH <sub>2</sub>  | 1.71300                      | 1.71300 | —       | —                     | —                 | —                 | —                 | —                 | —                                | —                 | —                 | —                 | —                 | —                 |
| MgH <sub>3</sub>  | 1.70161                      | 1.82721 | 1.82722 | —                     | —                 | —                 | —                 | —                 | —                                | —                 | —                 | —                 | —                 | —                 |
| MgH <sub>4</sub>  | 1.71288                      | 1.71288 | —       | 2.98836               | —                 | —                 | —                 | —                 | —                                | —                 | —                 | —                 | —                 | —                 |
| MgH <sub>5</sub>  | 1.70271                      | 1.82748 | 1.82756 | 2.59147               | —                 | —                 | —                 | —                 | —                                | —                 | —                 | —                 | —                 | —                 |
| MgH <sub>6</sub>  | 1.71379                      | 1.71379 | —       | 2.93379               | 2.93472           | —                 | —                 | —                 | —                                | —                 | —                 | —                 | —                 | —                 |
| MgH <sub>7</sub>  | 1.70288                      | 1.82725 | 1.82726 | 2.68058               | 2.68062           | —                 | —                 | —                 | —                                | —                 | —                 | —                 | —                 | —                 |
| MgH <sub>8</sub>  | 1.71412                      | 1.71412 | —       | 3.08689               | 2.90616           | 3.07781           | —                 | —                 | —                                | —                 | —                 | —                 | —                 | —                 |
| MgH <sub>9</sub>  | 1.70296                      | 1.82712 | 1.82717 | 2.67980               | 2.67961           | —                 | —                 | —                 | 5.88564                          | —                 | —                 | —                 | —                 | —                 |
| MgH <sub>10</sub> | 1.71402                      | 1.71402 | —       | 3.12919               | 3.12791           | 3.12633           | 3.12791           | —                 | —                                | —                 | —                 | —                 | —                 | —                 |
| MgH <sub>11</sub> | 1.70306                      | 1.82711 | 1.82710 | 2.67902               | 2.67870           | —                 | —                 | —                 | 5.98117                          | 6.08208           | —                 | —                 | —                 | —                 |
| MgH <sub>12</sub> | 1.71446                      | 1.71446 | —       | 3.14771               | 3.14788           | 3.16413           | 3.18103           | 3.16759           | —                                | —                 | —                 | —                 | —                 | —                 |
| MgH <sub>13</sub> | 1.70310                      | 1.82707 | 1.82710 | 2.67980               | 2.67658           | —                 | —                 | —                 | 6.08165                          | 5.98284           | 6.85342           | —                 | —                 | —                 |
| MgH <sub>14</sub> | 1.71455                      | 1.71434 | —       | 3.13756               | 3.17317           | 3.18912           | 3.15776           | 3.12863           | 5.60381                          | —                 | —                 | —                 | —                 | —                 |
| MgH <sub>15</sub> | 1.70303                      | 1.82721 | 1.82712 | 2.67608               | 2.68018           | —                 | —                 | —                 | 6.81136                          | 5.98576           | 6.07710           | 6.49964           | —                 | —                 |
| MgH <sub>16</sub> | 1.71447                      | 1.71446 | —       | 3.15311               | 3.16890           | 3.16386           | 3.14375           | 3.13462           | 5.92275                          | 5.75245           | —                 | —                 | —                 | —                 |
| MgH <sub>17</sub> | 1.70298                      | 1.82729 | 1.82724 | 2.67990               | 2.67529           | —                 | —                 | —                 | 6.84211                          | 5.98054           | 6.08239           | 6.49866           | 6.74343           | —                 |
| MgH <sub>18</sub> | 1.71441                      | 1.71450 | —       | 3.14032               | 3.13280           | 3.14963           | 3.16300           | 3.15543           | 5.59401                          | 5.49598           | 6.88750           | —                 | —                 | —                 |
| MgH <sub>19</sub> | 1.70298                      | 1.82731 | 1.82734 | 2.67816               | 2.67816           | —                 | —                 | —                 | 5.68970                          | 5.67690           | 6.87156           | 6.76933           | 6.63894           | 6.79833           |
| MgH <sub>20</sub> | 1.71385                      | 1.71492 | —       | 3.14956               | 3.14468           | 3.14686           | 3.15397           | 3.15776           | 5.55084                          | 6.04109           | 6.07328           | 6.69734           | —                 | —                 |

**Table S4.** ADCH analysis on Mg and H atoms in all optimized MgH<sub>n</sub> (n=1-20) clusters.

| Clusters          | Mg   | H-2   | H-3   | H-4   | H-5   | H-6   | H-7   | H-8   | H-9   | H-10  | H-11  | H-12  | H-13  | H-14 | H-15 | H-16 | H-17 | H-18 | H-19 | H-20 | H-21 |
|-------------------|------|-------|-------|-------|-------|-------|-------|-------|-------|-------|-------|-------|-------|------|------|------|------|------|------|------|------|
| MgH <sub>1</sub>  | 0.16 | -0.16 |       |       |       |       |       |       |       |       |       |       |       |      |      |      |      |      |      |      |      |
| MgH <sub>2</sub>  | 0.49 | -0.25 | -0.25 |       |       |       |       |       |       |       |       |       |       |      |      |      |      |      |      |      |      |
| MgH <sub>3</sub>  | 0.44 | -0.24 | -0.10 | -0.10 |       |       |       |       |       |       |       |       |       |      |      |      |      |      |      |      |      |
| MgH <sub>4</sub>  | 0.57 | -0.27 | -0.27 | -0.02 | -0.02 |       |       |       |       |       |       |       |       |      |      |      |      |      |      |      |      |
| MgH <sub>5</sub>  | 0.42 | -0.12 | -0.13 | -0.06 | -0.07 | -0.03 |       |       |       |       |       |       |       |      |      |      |      |      |      |      |      |
| MgH <sub>6</sub>  | 0.56 | -0.02 | -0.25 | -0.02 | -0.25 | -0.02 | -0.02 |       |       |       |       |       |       |      |      |      |      |      |      |      |      |
| MgH <sub>7</sub>  | 0.34 | -0.10 | 0.03  | 0.03  | -0.24 | 0.02  | -0.10 | 0.02  |       |       |       |       |       |      |      |      |      |      |      |      |      |
| MgH <sub>8</sub>  | 0.59 | -0.25 | -0.02 | -0.02 | -0.25 | -0.01 | -0.01 | -0.01 | -0.01 |       |       |       |       |      |      |      |      |      |      |      |      |
| MgH <sub>9</sub>  | 0.34 | -0.10 | 0.03  | 0.03  | -0.24 | 0.02  | -0.10 | 0.02  | 0.00  | 0.00  |       |       |       |      |      |      |      |      |      |      |      |
| MgH <sub>10</sub> | 0.41 | -0.25 | 0.01  | 0.01  | 0.01  | 0.01  | 0.01  | 0.01  | 0.01  | 0.01  | -0.25 |       |       |      |      |      |      |      |      |      |      |
| MgH <sub>11</sub> | 0.34 | 0.02  | 0.03  | 0.02  | -0.10 | 0.03  | -0.10 | -0.24 | 0.00  | 0.00  | 0.00  | 0.00  |       |      |      |      |      |      |      |      |      |
| MgH <sub>12</sub> | 0.40 | 0.01  | 0.01  | 0.01  | 0.01  | 0.01  | 0.01  | 0.01  | 0.01  | 0.01  | -0.25 | 0.01  | -0.25 |      |      |      |      |      |      |      |      |
| MgH <sub>13</sub> | 0.34 | 0.02  | 0.03  | 0.02  | -0.10 | 0.03  | -0.10 | -0.24 | 0.00  | 0.00  | 0.00  | 0.00  | 0.00  | 0.00 |      |      |      |      |      |      |      |
| MgH <sub>14</sub> | 0.40 | 0.01  | -0.25 | 0.01  | 0.01  | 0.01  | -0.25 | 0.01  | 0.01  | 0.01  | 0.01  | 0.01  | 0.01  | 0.00 | 0.00 |      |      |      |      |      |      |
| MgH <sub>15</sub> | 0.34 | 0.02  | 0.03  | 0.02  | -0.10 | 0.03  | 0.00  | -0.10 | -0.24 | 0.00  | 0.00  | 0.00  | 0.00  | 0.00 | 0.00 | 0.00 |      |      |      |      |      |
| MgH <sub>16</sub> | 0.40 | 0.01  | 0.01  | 0.00  | 0.01  | 0.00  | 0.01  | 0.01  | -0.25 | 0.00  | -0.25 | 0.01  | 0.00  | 0.01 | 0.01 | 0.01 | 0.01 |      |      |      |      |
| MgH <sub>17</sub> | 0.34 | 0.02  | 0.03  | 0.02  | -0.10 | 0.00  | 0.03  | 0.00  | -0.10 | -0.24 | 0.00  | 0.00  | 0.00  | 0.00 | 0.00 | 0.00 | 0.00 | 0.00 |      |      |      |
| MgH <sub>18</sub> | 0.40 | 0.00  | 0.01  | 0.01  | -0.25 | 0.01  | 0.00  | -0.25 | 0.01  | 0.01  | 0.01  | 0.01  | 0.01  | 0.01 | 0.01 | 0.00 | 0.00 | 0.00 | 0.00 |      |      |
| MgH <sub>19</sub> | 0.34 | -0.24 | 0.03  | 0.02  | -0.10 | 0.03  | 0.02  | 0.00  | 0.00  | 0.00  | 0.00  | -0.10 | 0.00  | 0.00 | 0.00 | 0.00 | 0.00 | 0.00 | 0.00 | 0.00 |      |
| MgH <sub>20</sub> | 0.40 | 0.01  | 0.01  | 0.00  | 0.01  | 0.00  | 0.01  | 0.01  | -0.25 | 0.00  | -0.25 | 0.01  | 0.00  | 0.01 | 0.01 | 0.01 | 0.01 | 0.00 | 0.00 | 0.00 | 0.00 |

The ADCH (atomic dipole moment corrected Hirshfeld population) charge proposed by Lu Tian et al. [S8] is an improved version of Hirshfeld charge, it resolved many inherent drawbacks of Hirshfeld charge, such as poor dipole moment reproducibility. ADCH calculation can be easily obtained through Multiwfn software [S9]. For all clusters, we use a standard color rendering, i.e. an ADCH of 0.59 for the Mg atom in the MgH<sub>8</sub> isomer is assigned as the blue maximum, while the minimum ADCH of -0.25 for the H atom in all isomers is rendered as the red maximum. All the remaining colors are rendered accordingly to varying degrees within this range [S10].

#### Reference

- [S8] Lu, Tian, and Feiwu Chen. "Atomic dipole moment corrected Hirshfeld population method." *Journal of Theoretical and Computational Chemistry* 11.01 (2012): 163-183.
- [S9] Tian Lu, FeiwuChen. "Multiwfn: A Multifunctional Wavefunction Analyzer." *J. Comput., and Chem* 33 (2012).
- [S10] Specific ADCH plot operations can be found in section 4.7.2 of the Multiwfn manual, which can be download directly online in the following website, [http://sobereva.com/multiwfn/misc/Multiwfn\\_3.8\\_dev.pdf](http://sobereva.com/multiwfn/misc/Multiwfn_3.8_dev.pdf).

**Table S5.** Topological analysis for all optimized  $\text{MgH}_n$  ( $n=1-20$ ) clusters, including connecting atoms and numbering of bond critical points (BCPs) bonding, electron density, Laplacian of electron density, ELF and atom distance.

**Table S5-1.**  $\text{MgH}_n$  ( $n=1,2,3,4$ )

| 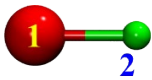   |                 |                |                        |         |                   |
|-------------------------------------------------------------------------------------|-----------------|----------------|------------------------|---------|-------------------|
| Cluster                                                                             | Connected atoms | $\rho$ / a. u. | $\nabla^2\rho$ / a. u. | ELF     | Atom distance / Å |
| $\text{MgH}_1$                                                                      | 1(Mg)--2(H)     | 0.04733        | 0.16932                | 0.13200 | 1.75194           |
|    |                 |                |                        |         |                   |
| Cluster                                                                             | Connected atoms | $\rho$ / a. u. | $\nabla^2\rho$ / a. u. | ELF     | Atom distance / Å |
| $\text{MgH}_2$                                                                      | 1(Mg)--2(H)     | 0.05206        | 0.19550                | 0.13359 | 1.71253           |
|                                                                                     | 3(H)--1(Mg)     | 0.05206        | 0.19550                | 0.13359 | 1.71253           |
|   |                 |                |                        |         |                   |
| Cluster                                                                             | Connected atoms | $\rho$ / a. u. | $\nabla^2\rho$ / a. u. | ELF     | Atom distance / Å |
| $\text{MgH}_3$                                                                      | 3(H)--1(Mg)     | 0.03923        | 0.13416                | 0.11518 | 1.82721           |
|                                                                                     | 2(H)--1(Mg)     | 0.05292        | 0.20079                | 0.13405 | 1.70161           |
|                                                                                     | 3(H)--4(H)      | 0.05056        | 0.03535                | 0.58727 | 1.55027           |
|                                                                                     | 1(Mg)--4(H)     | 0.03923        | 0.13416                | 0.11518 | 1.82722           |
|  |                 |                |                        |         |                   |
| Cluster                                                                             | Connected atoms | $\rho$ / a. u. | $\nabla^2\rho$ / a. u. | ELF     | Atom distance / Å |
| $\text{MgH}_4$                                                                      | 3(H)--1(Mg)     | 0.05197        | 0.19573                | 0.13308 | 1.71288           |
|                                                                                     | 4(H)--1(Mg)     | 0.00377        | 0.00794                | 0.02524 | 2.98836           |
|                                                                                     | 4(H)--5(H)      | 0.24357        | -0.87491               | 1.00000 | 0.74604           |
|                                                                                     | 1(Mg)--5(H)     | 0.00377        | 0.00794                | 0.02524 | 2.98843           |
|                                                                                     | 1(Mg)--2(H)     | 0.05197        | 0.19573                | 0.13308 | 1.71288           |

Table S5-2.  $\text{MgH}_n$  ( $n=5,6$ )

| 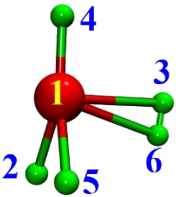  |                 |                |                        |         |                   |
|------------------------------------------------------------------------------------|-----------------|----------------|------------------------|---------|-------------------|
| Cluster                                                                            | Connected atoms | $\rho$ / a. u. | $\nabla^2\rho$ / a. u. | ELF     | Atom distance / Å |
| MgH <sub>5</sub>                                                                   | 4(H)--1(Mg)     | 0.05271        | 0.20063                | 0.13328 | 1.70271           |
|                                                                                    | 3(H)--6(H)      | 0.24215        | -0.86471               | 1.00000 | 0.74816           |
|                                                                                    | 1(Mg)--3(H)     | 0.00666        | 0.02394                | 0.01759 | 2.58656           |
|                                                                                    | 1(Mg)--6(H)     | 0.00664        | 0.01732                | 0.02816 | 2.59147           |
|                                                                                    | 1(Mg)--6(H)     | 0.00666        | 0.02394                | 0.01759 | 2.59147           |
|                                                                                    | 1(Mg)--2(H)     | 0.03916        | 0.13705                | 0.11159 | 1.82756           |
|                                                                                    | 1(Mg)--5(H)     | 0.03916        | 0.13709                | 0.11158 | 1.82748           |
|                                                                                    | 2(H)--5(H)      | 0.05446        | 0.03590                | 0.60341 | 1.49548           |
|  |                 |                |                        |         |                   |
| Cluster                                                                            | Connected atoms | $\rho$ / a. u. | $\nabla^2\rho$ / a. u. | ELF     | Atom distance / Å |
| MgH <sub>6</sub>                                                                   | 6(H)--7(H)      | 0.24342        | -0.87386               | 1.00000 | 0.74626           |
|                                                                                    | 6(H)--1(Mg)     | 0.00410        | 0.00847                | 0.02805 | 2.93472           |
|                                                                                    | 7(H)--1(Mg)     | 0.00409        | 0.00847                | 0.02797 | 2.9352            |
|                                                                                    | 3(H)--1(Mg)     | 0.05182        | 0.19573                | 0.13241 | 1.71379           |
|                                                                                    | 1(Mg)--5(H)     | 0.05182        | 0.19573                | 0.13242 | 1.71379           |
|                                                                                    | 1(Mg)--2(H)     | 0.00410        | 0.00848                | 0.02808 | 2.93379           |
|                                                                                    | 1(Mg)--4(H)     | 0.00410        | 0.00848                | 0.02808 | 2.9338            |
|                                                                                    | 2(H)--4(H)      | 0.24342        | -0.87385               | 1.00000 | 0.74626           |

**Table S5-3. MgH<sub>n</sub> (n=7,8)**

| Cluster          | Connected atoms | $\rho$ / a. u. | $\nabla^2\rho$ / a. u. | ELF     | Atom distance / Å |
|------------------|-----------------|----------------|------------------------|---------|-------------------|
| MgH <sub>7</sub> | 2(H)--7(H)      | 0.05919        | 0.03348                | 0.62703 | 1.43815           |
|                  | 2(H)--1(Mg)     | 0.03919        | 0.14037                | 0.10839 | 1.82725           |
|                  | 7(H)--1(Mg)     | 0.03919        | 0.14036                | 0.10839 | 1.82726           |
|                  | 8(H)--1(Mg)     | 0.00595        | 0.01442                | 0.02897 | 2.68058           |
|                  | 8(H)--3(H)      | 0.24266        | -0.86833               | 1.00000 | 0.74738           |
|                  | 6(H)--1(Mg)     | 0.00595        | 0.01442                | 0.02896 | 2.68062           |
|                  | 6(H)--4(H)      | 0.24266        | -0.86833               | 1.00000 | 0.74738           |
| 1(Mg)--5(H)      | 0.05268         | 0.20081        | 0.13305                | 1.70288 |                   |
|                  |                 |                |                        |         |                   |
| Cluster          | Connected atoms | $\rho$ / a. u. | $\nabla^2\rho$ / a. u. | ELF     | Atom distance / Å |
| MgH <sub>8</sub> | 5(H)--1(Mg)     | 0.05176        | 0.19587                | 0.13209 | 1.71412           |
|                  | 1(Mg)--7(H)     | 0.00324        | 0.00710                | 0.02050 | 3.08689           |
|                  | 7(H)--6(H)      | 0.24386        | -0.87688               | 1.00000 | 0.74559           |
|                  | 1(Mg)--6(H)     | 0.00324        | 0.00710                | 0.02050 | 3.08689           |
|                  | 1(Mg)--2(H)     | 0.05176        | 0.19587                | 0.13209 | 1.71412           |
|                  | 1(Mg)--9(H)     | 0.00329        | 0.00718                | 0.02091 | 3.07781           |
|                  | 1(Mg)--8(H)     | 0.00329        | 0.00718                | 0.02091 | 3.07785           |
|                  | 9(H)--8(H)      | 0.24384        | -0.87672               | 1.00000 | 0.74562           |
|                  | 1(Mg)--3(H)     | 0.00428        | 0.00876                | 0.02970 | 2.90616           |
|                  | 1(Mg)--4(H)     | 0.00428        | 0.00876                | 0.02970 | 2.90614           |
|                  | 3(H)--4(H)      | 0.24335        | -0.87329               | 1.00000 | 0.74639           |



Table S5-4. MgH<sub>9</sub>

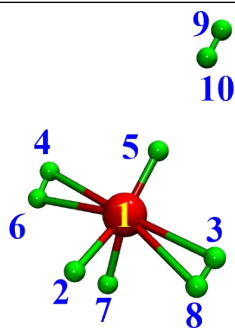

| Cluster          | Connected atoms | $\rho$ / a. u. | $\nabla^2\rho$ / a. u. | ELF     | Atom distance / Å |
|------------------|-----------------|----------------|------------------------|---------|-------------------|
| MgH <sub>9</sub> | 8(H)--3(H)      | 0.24265        | -0.86830               | 1.00000 | 0.74739           |
|                  | 8(H)--1(Mg)     | 0.00596        | 0.01443                | 0.02902 | 2.67961           |
|                  | 7(H)--2(H)      | 0.05912        | 0.03353                | 0.62673 | 1.43896           |
|                  | 7(H)--1(Mg)     | 0.03920        | 0.14038                | 0.10845 | 1.82712           |
|                  | 2(H)--1(Mg)     | 0.03920        | 0.14035                | 0.10846 | 1.82717           |
|                  | 1(Mg)--5(H)     | 0.05266        | 0.20086                | 0.13292 | 1.70296           |
|                  | 10(H)--9(H)     | 0.24496        | -0.88388               | 1.00000 | 0.74377           |
|                  | 1(Mg)--6(H)     | 0.00596        | 0.01443                | 0.02901 | 2.6798            |

Table S5-5. MgH<sub>10</sub>

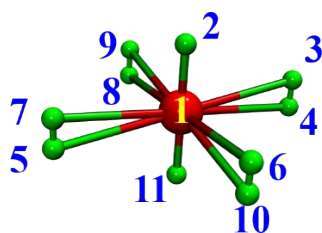

| Cluster           | Connected atoms | $\rho$ / a. u. | $\nabla^2\rho$ / a. u. | ELF     | Atom distance / Å |
|-------------------|-----------------|----------------|------------------------|---------|-------------------|
| MgH <sub>10</sub> | 10(H)--1(Mg)    | 0.00303        | 0.00673                | 0.01878 | 3.12919           |
|                   | 11(H)--1(Mg)    | 0.05179        | 0.19612                | 0.13205 | 1.71402           |
|                   | 10(H)--6(H)     | 0.24395        | -0.87748               | 1.00000 | 0.74545           |
|                   | 5(H)--1(Mg)     | 0.00304        | 0.00674                | 0.01883 | 3.12791           |
|                   | 5(H)--7(H)      | 0.24395        | -0.87747               | 1.00000 | 0.74545           |
|                   | 1(Mg)--4(H)     | 0.00304        | 0.00674                | 0.01883 | 3.12791           |
|                   | 1(Mg)--8(H)     | 0.00304        | 0.00676                | 0.01890 | 3.12633           |
|                   | 6(H)--1(Mg)     | 0.00303        | 0.00673                | 0.01878 | 3.12919           |
|                   | 7(H)--1(Mg)     | 0.00304        | 0.00674                | 0.01883 | 3.12791           |
|                   | 4(H)--3(H)      | 0.24395        | -0.87747               | 1.00000 | 0.74545           |
|                   | 1(Mg)--3(H)     | 0.00304        | 0.00674                | 0.01883 | 3.12791           |
|                   | 8(H)--9(H)      | 0.24395        | -0.87745               | 1.00000 | 0.74546           |
|                   | 1(Mg)--2(H)     | 0.05179        | 0.19612                | 0.13205 | 1.71402           |
|                   | 1(Mg)--9(H)     | 0.00304        | 0.00676                | 0.01890 | 3.12633           |

Table S5-6. MgH<sub>11</sub>

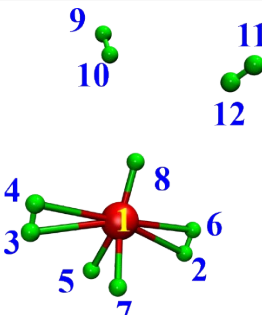

| Cluster           | Connected atoms | $\rho$ / a. u. | $\nabla^2\rho$ / a. u. | ELF     | Atom distance / Å |
|-------------------|-----------------|----------------|------------------------|---------|-------------------|
| MgH <sub>11</sub> | 11(H)--12(H)    | 0.24499        | -0.88406               | 1.00000 | 0.74739           |
|                   | 2(H)--6(H)      | 0.24265        | -0.86827               | 1.00000 | 0.74739           |
|                   | 2(H)--1(Mg)     | 0.00597        | 0.01445                | 0.02905 | 2.6787            |
|                   | 7(H)--1(Mg)     | 0.03920        | 0.14038                | 0.10846 | 1.8271            |
|                   | 7(H)--5(H)      | 0.05912        | 0.03353                | 0.62673 | 1.43904           |
|                   | 1(Mg)--5(H)     | 0.03920        | 0.14038                | 0.10846 | 1.82711           |
|                   | 1(Mg)--8(H)     | 0.05264        | 0.20078                | 0.13292 | 1.70306           |
|                   | 1(Mg)--4(H)     | 0.00597        | 0.01444                | 0.02905 | 2.67902           |
|                   | 4(H)--3(H)      | 0.24265        | -0.86829               | 1.00000 | 0.74739           |
|                   | 10(H)--9(H)     | 0.24498        | -0.88404               | 1.00000 | 0.74372           |

Table S5-7. MgH<sub>12</sub>

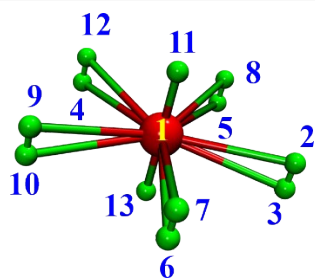

| Cluster           | Connected atoms | $\rho$ / a. u. | $\nabla^2\rho$ / a. u. | ELF     | Atom distance / Å |
|-------------------|-----------------|----------------|------------------------|---------|-------------------|
| MgH <sub>12</sub> | 9(H)--10(H)     | 0.24410        | -0.87845               | 1.00000 | 0.74525           |
|                   | 7(H)--6(H)      | 0.24406        | -0.87818               | 1.00000 | 0.74531           |
|                   | 9(H)--1(Mg)     | 0.00285        | 0.00638                | 0.01743 | 3.16759           |
|                   | 10(H)--1(Mg)    | 0.00285        | 0.00638                | 0.01743 | 3.16759           |
|                   | 7(H)--1(Mg)     | 0.00295        | 0.00654                | 0.01822 | 3.14771           |
|                   | 6(H)--1(Mg)     | 0.00295        | 0.00654                | 0.01822 | 3.14771           |
|                   | 11(H)--1(Mg)    | 0.05171        | 0.19622                | 0.13161 | 1.71446           |
|                   | 1(Mg)--12(H)    | 0.00279        | 0.00627                | 0.01691 | 3.18103           |
|                   | 12(H)--4(H)     | 0.24413        | -0.87863               | 1.00000 | 0.74521           |
|                   | 1(Mg)--4(H)     | 0.00279        | 0.00627                | 0.01691 | 3.18104           |
|                   | 1(Mg)--13(H)    | 0.05171        | 0.19622                | 0.13161 | 1.71446           |
|                   | 1(Mg)--2(H)     | 0.00295        | 0.00654                | 0.01821 | 3.14788           |
|                   | 1(Mg)--3(H)     | 0.00295        | 0.00654                | 0.01821 | 3.14788           |
|                   | 1(Mg)--8(H)     | 0.00287        | 0.00641                | 0.01756 | 3.16413           |
|                   | 1(Mg)--5(H)     | 0.00287        | 0.00641                | 0.01757 | 3.16411           |
|                   | 2(H)--3(H)      | 0.24406        | -0.87818               | 1.00000 | 0.74531           |
| 8(H)--5(H)        | 0.24410         | -0.87840       | 1.00000                | 0.74526 |                   |

Table S5-8. MgH<sub>13</sub>

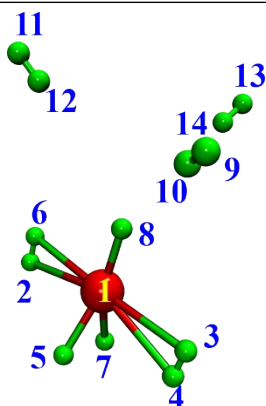

| Cluster           | Connected atoms | $\rho$ / a. u. | $\nabla^2\rho$ / a. u. | ELF     | Atom distance / Å |
|-------------------|-----------------|----------------|------------------------|---------|-------------------|
| MgH <sub>13</sub> | 4(H)--3(H)      | 0.24264        | -0.86824               | 1.00000 | 0.7474            |
|                   | 13(H)--14(H)    | 0.24501        | -0.88420               | 1.00000 | 0.74367           |
|                   | 4(H)--1(Mg)     | 0.00599        | 0.01449                | 0.02920 | 2.67658           |
|                   | 5(H)--7(H)      | 0.05914        | 0.03351                | 0.62683 | 1.43884           |
|                   | 5(H)--1(Mg)     | 0.03920        | 0.14039                | 0.10845 | 1.8271            |
|                   | 7(H)--1(Mg)     | 0.03921        | 0.14041                | 0.10845 | 1.82707           |
|                   | 1(Mg)--8(H)     | 0.05264        | 0.20077                | 0.13290 | 1.7031            |
|                   | 9(H)--10(H)     | 0.24499        | -0.88405               | 1.00000 | 0.74372           |
|                   | 1(Mg)--2(H)     | 0.00596        | 0.01443                | 0.02903 | 2.6798            |
|                   | 2(H)--6(H)      | 0.24265        | -0.86830               | 1.00000 | 0.74738           |
|                   | 12(H)--11(H)    | 0.24499        | -0.88407               | 1.00000 | 0.74372           |

Table S5-9. MgH<sub>14</sub>

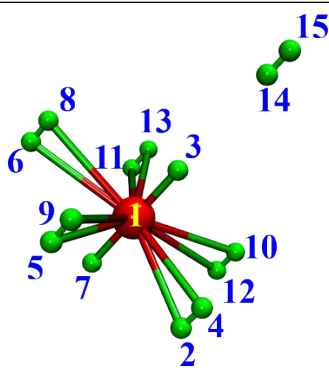

| Cluster           | Connected atoms | $\rho$ / a. u. | $\nabla^2\rho$ / a. u. | ELF     | Atom distance / Å |
|-------------------|-----------------|----------------|------------------------|---------|-------------------|
| MgH <sub>14</sub> | 4(H)--2(H)      | 0.24404        | -0.87802               | 1.00000 | 0.74535           |
|                   | 10(H)--12(H)    | 0.24411        | -0.87853               | 1.00000 | 0.74523           |
|                   | 4(H)--1(Mg)     | 0.00299        | 0.00662                | 0.01862 | 3.13756           |
|                   | 2(H)--1(Mg)     | 0.00301        | 0.00664                | 0.01875 | 3.13595           |
|                   | 10(H)--1(Mg)    | 0.00283        | 0.00633                | 0.01722 | 3.17317           |
|                   | 12(H)--1(Mg)    | 0.00283        | 0.00634                | 0.01728 | 3.17203           |
|                   | 15(H)--14(H)    | 0.24493        | -0.88370               | 1.00000 | 0.74382           |
|                   | 3(H)--1(Mg)     | 0.05168        | 0.19629                | 0.13143 | 1.71455           |
|                   | 1(Mg)--7(H)     | 0.05173        | 0.19627                | 0.13165 | 1.71434           |
|                   | 1(Mg)--9(H)     | 0.00304        | 0.00670                | 0.01902 | 3.12863           |
|                   | 1(Mg)--5(H)     | 0.00304        | 0.00671                | 0.01907 | 3.12774           |
|                   | 9(H)--5(H)      | 0.24402        | -0.87789               | 1.00000 | 0.74538           |
|                   | 1(Mg)--13(H)    | 0.00275        | 0.00620                | 0.01660 | 3.18912           |
|                   | 1(Mg)--11(H)    | 0.00276        | 0.00622                | 0.01671 | 3.18741           |
|                   | 1(Mg)--8(H)     | 0.00290        | 0.00646                | 0.01782 | 3.15776           |
|                   | 13(H)--11(H)    | 0.24414        | -0.87874               | 1.00000 | 0.74518           |
|                   | 1(Mg)--6(H)     | 0.00291        | 0.00647                | 0.01789 | 3.15659           |
|                   | 8(H)--6(H)      | 0.24408        | -0.87831               | 1.00000 | 0.74528           |

Table S5-10. MgH<sub>15</sub>

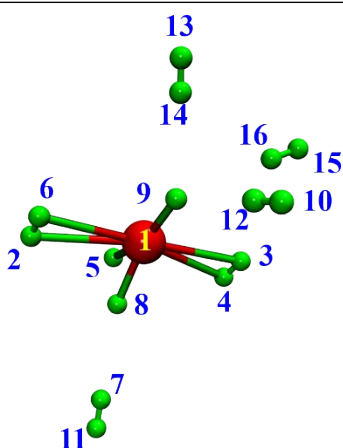

| Cluster           | Connected atoms | $\rho$ / a. u. | $\nabla^2\rho$ / a. u. | ELF     | Atom distance / Å |
|-------------------|-----------------|----------------|------------------------|---------|-------------------|
| MgH <sub>15</sub> | 13(H)--14(H)    | 0.24499        | -0.88406               | 1.00000 | 0.74372           |
|                   | 6(H)--2(H)      | 0.24265        | -0.86831               | 1.00000 | 0.74738           |
|                   | 2(H)--1(Mg)     | 0.00596        | 0.01442                | 0.02902 | 2.68018           |
|                   | 9(H)--1(Mg)     | 0.05265        | 0.20080                | 0.13293 | 1.70303           |
|                   | 12(H)--10(H)    | 0.24499        | -0.88405               | 1.00000 | 0.74372           |
|                   | 1(Mg)--8(H)     | 0.03920        | 0.14046                | 0.10837 | 1.82712           |
|                   | 1(Mg)--5(H)     | 0.03920        | 0.14042                | 0.10836 | 1.82721           |
|                   | 8(H)--5(H)      | 0.05927        | 0.03342                | 0.62744 | 1.70303           |
|                   | 1(Mg)--4(H)     | 0.00599        | 0.01450                | 0.02920 | 2.67608           |
|                   | 11(H)--7(H)     | 0.24501        | -0.88423               | 1.00000 | 0.74367           |
|                   | 3(H)--4(H)      | 0.24264        | -0.86819               | 1.00000 | 0.74741           |
|                   | 16(H)--15(H)    | 0.24501        | -0.88420               | 1.00000 | 0.74367           |

Table S5-11. MgH<sub>16</sub>

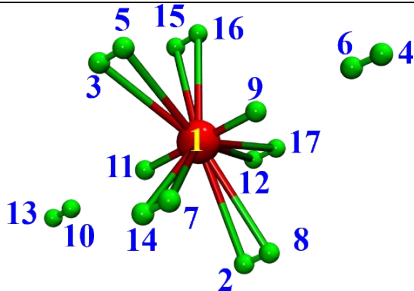

| Cluster           | Connected atoms | $\rho$ / a. u. | $\nabla^2\rho$ / a. u. | ELF     | Atom distance / Å |
|-------------------|-----------------|----------------|------------------------|---------|-------------------|
| MgH <sub>16</sub> | 14(H)--7(H)     | 0.24403        | -0.87799               | 1.00000 | 0.74535           |
|                   | 3(H)--5(H)      | 0.24405        | -0.87812               | 1.00000 | 0.74532           |
|                   | 14(H)--1(Mg)    | 0.00301        | 0.00665                | 0.01878 | 3.13462           |
|                   | 7(H)--1(Mg)     | 0.00301        | 0.00666                | 0.01881 | 3.13434           |
|                   | 3(H)--1(Mg)     | 0.00297        | 0.00657                | 0.01841 | 3.14375           |
|                   | 5(H)--1(Mg)     | 0.00297        | 0.00657                | 0.01840 | 3.14382           |
|                   | 13(H)--10(H)    | 0.24496        | -0.88387               | 1.00000 | 0.74377           |
|                   | 11(H)--1(Mg)    | 0.05170        | 0.19628                | 0.13152 | 1.71447           |
|                   | 2(H)--1(Mg)     | 0.00292        | 0.00650                | 0.01804 | 3.15311           |
|                   | 2(H)--8(H)      | 0.24407        | -0.87826               | 1.00000 | 0.74529           |
|                   | 8(H)--1(Mg)     | 0.00292        | 0.00649                | 0.01798 | 3.15392           |
|                   | 1(Mg)--9(H)     | 0.05170        | 0.19631                | 0.13148 | 1.71446           |
|                   | 6(H)--4(H)      | 0.24495        | -0.88379               | 1.00000 | 0.74379           |
|                   | 1(Mg)--15(H)    | 0.00287        | 0.00641                | 0.01759 | 3.16386           |
|                   | 1(Mg)--16(H)    | 0.00287        | 0.00641                | 0.01762 | 3.16346           |
|                   | 1(Mg)--12(H)    | 0.00285        | 0.00637                | 0.01740 | 3.1689            |
|                   | 1(Mg)--17(H)    | 0.00284        | 0.00636                | 0.01737 | 3.16936           |
|                   | 15(H)--16(H)    | 0.24409        | -0.87840               | 1.00000 | 0.74526           |
| 12(H)--17(H)      | 0.24411         | -0.87848       | 1.00000                | 0.74524 |                   |



Table S5-12. MgH<sub>17</sub>

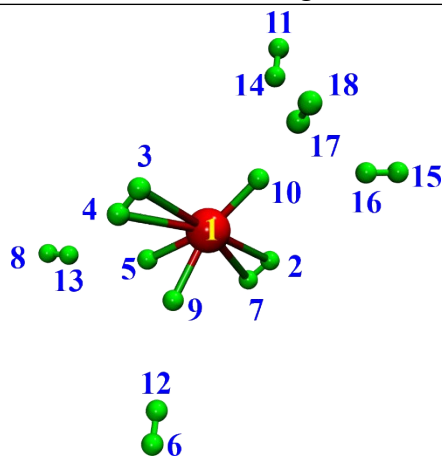

| Cluster           | Connected atoms | $\rho$ / a. u. | $\nabla^2\rho$ / a. u. | ELF     | Atom distance / Å |
|-------------------|-----------------|----------------|------------------------|---------|-------------------|
| MgH <sub>17</sub> | 6(H)--12(H)     | 0.24501        | -0.88424               | 1.00000 | 0.74367           |
|                   | 15(H)--16(H)    | 0.24499        | -0.88407               | 1.00000 | 0.74372           |
|                   | 17(H)--18(H)    | 0.24501        | -0.88420               | 1.00000 | 0.74367           |
|                   | 9(H)--1(Mg)     | 0.03919        | 0.14045                | 0.10831 | 1.82724           |
|                   | 9(H)--5(H)      | 0.05932        | 0.03340                | 0.62762 | 1.43669           |
|                   | 2(H)--7(H)      | 0.24265        | -0.86829               | 1.00000 | 0.74739           |
|                   | 2(H)--1(Mg)     | 0.00596        | 0.01443                | 0.02901 | 2.6799            |
|                   | 1(Mg)--4(H)     | 0.00600        | 0.01452                | 0.02923 | 2.67529           |
|                   | 1(Mg)--5(H)     | 0.03919        | 0.14042                | 0.10831 | 1.82729           |
|                   | 4(H)--3(H)      | 0.24264        | -0.86818               | 1.00000 | 0.74741           |
|                   | 1(Mg)--10(H)    | 0.05265        | 0.20082                | 0.13295 | 1.70298           |
|                   | 13(H)--8(H)     | 0.24501        | -0.88423               | 1.00000 | 0.74367           |
|                   | 14(H)--11(H)    | 0.24499        | -0.88405               | 1.00000 | 0.74372           |

Table S5-13. MgH<sub>18</sub>

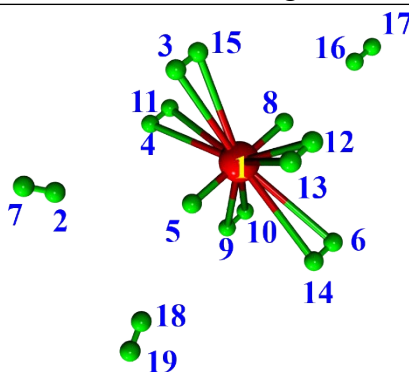

| Cluster           | Connected atoms | $\rho$ / a. u. | $\nabla^2\rho$ / a. u. | ELF     | Atom distance / Å |
|-------------------|-----------------|----------------|------------------------|---------|-------------------|
| MgH <sub>18</sub> | 12(H)--13(H)    | 0.24404        | -0.87800               | 1.00000 | 0.74535           |
|                   | 17(H)--16(H)    | 0.24493        | -0.88369               | 1.00000 | 0.74382           |
|                   | 7(H)--2(H)      | 0.24501        | -0.88420               | 1.00000 | 0.74368           |
|                   | 12(H)--1(Mg)    | 0.00303        | 0.00667                | 0.01894 | 3.1328            |
|                   | 13(H)--1(Mg)    | 0.00300        | 0.00664                | 0.01868 | 3.13541           |
|                   | 6(H)--14(H)     | 0.24407        | -0.87821               | 1.00000 | 0.7453            |
|                   | 3(H)--15(H)     | 0.24405        | -0.87808               | 1.00000 | 0.74533           |
|                   | 6(H)--1(Mg)     | 0.00294        | 0.00653                | 0.01818 | 3.14963           |
|                   | 3(H)--1(Mg)     | 0.00298        | 0.00660                | 0.01856 | 3.14032           |
|                   | 14(H)--1(Mg)    | 0.00294        | 0.00652                | 0.01816 | 3.14985           |
|                   | 8(H)--1(Mg)     | 0.05170        | 0.19636                | 0.13149 | 1.71441           |
|                   | 15(H)--1(Mg)    | 0.00298        | 0.00660                | 0.01852 | 3.14082           |
|                   | 1(Mg)--5(H)     | 0.05169        | 0.19632                | 0.13145 | 1.7145            |
|                   | 1(Mg)--10(H)    | 0.00288        | 0.00642                | 0.01767 | 3.163             |
|                   | 1(Mg)--4(H)     | 0.00291        | 0.00648                | 0.01796 | 3.15543           |
|                   | 1(Mg)--9(H)     | 0.00287        | 0.00641                | 0.01760 | 3.16398           |
|                   | 1(Mg)--11(H)    | 0.00291        | 0.00647                | 0.01792 | 3.15601           |
|                   | 10(H)--9(H)     | 0.24409        | -0.87840               | 1.00000 | 0.74526           |
|                   | 4(H)--11(H)     | 0.24408        | -0.87830               | 1.00000 | 0.74528           |
|                   | 18(H)--19(H)    | 0.24494        | -0.88369               | 1.00000 | 0.74383           |

Table S5-14. MgH<sub>19</sub>
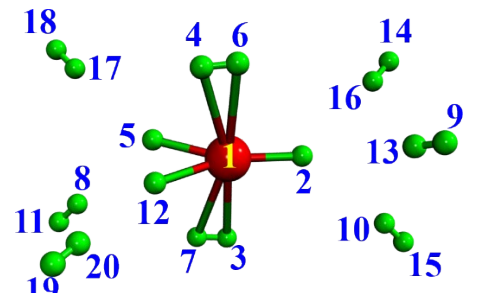

| Cluster           | Connected atoms | $\rho$ / a. u. | $\nabla^2\rho$ / a. u. | ELF     | Atom distance / Å |
|-------------------|-----------------|----------------|------------------------|---------|-------------------|
| MgH <sub>19</sub> | 18(H)--17(H)    | 0.24498        | -0.88399               | 1.00000 | 0.74375           |
|                   | 15(H)--10(H)    | 0.24502        | -0.88426               | 1.00000 | 0.74375           |
|                   | 14(H)--16(H)    | 0.24501        | -0.88424               | 1.00000 | 0.74367           |
|                   | 2(H)--1(Mg)     | 0.05265        | 0.20086                | 0.13292 | 1.70298           |
|                   | 3(H)--7(H)      | 0.24264        | -0.86825               | 1.00000 | 0.7474            |
|                   | 5(H)--1(Mg)     | 0.03918        | 0.14031                | 0.10840 | 1.82734           |
|                   | 1(Mg)--7(H)     | 0.00597        | 0.01446                | 0.02904 | 2.67832           |
|                   | 6(H)--4(H)      | 0.24264        | -0.86824               | 1.00000 | 0.7474            |
|                   | 1(Mg)--4(H)     | 0.00597        | 0.01446                | 0.02904 | 2.67816           |
|                   | 5(H)--12(H)     | 0.05916        | 0.03354                | 0.62674 | 1.43852           |
|                   | 1(Mg)--12(H)    | 0.03918        | 0.14032                | 0.10839 | 1.82731           |
|                   | 20(H)--19(H)    | 0.24497        | -0.88397               | 1.00000 | 0.74375           |
|                   | 13(H)--9(H)     | 0.24502        | -0.88424               | 1.00000 | 0.74367           |
|                   | 11(H)--8(H)     | 0.24502        | -0.88427               | 1.00000 | 0.74366           |

Table S5-15. MgH<sub>20</sub>

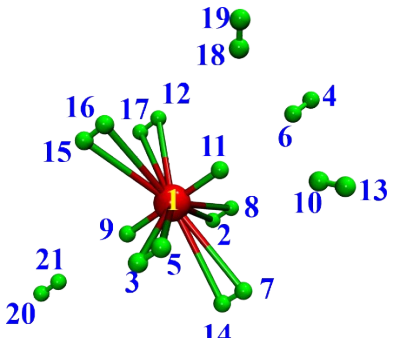

| Cluster           | Connected atoms | $\rho$ / a. u. | $\nabla^2\rho$ / a. u. | ELF     | Atom distance / Å |
|-------------------|-----------------|----------------|------------------------|---------|-------------------|
| MgH <sub>20</sub> | 16(H)--15(H)    | 0.24404        | -0.87806               | 1.00000 | 0.74534           |
|                   | 5(H)--3(H)      | 0.24404        | -0.87804               | 1.00000 | 0.74535           |
|                   | 13(H)--10(H)    | 0.24501        | -0.88421               | 1.00000 | 0.74372           |
|                   | 16(H)--1(Mg)    | 0.00301        | 0.00665                | 0.01885 | 3.13615           |
|                   | 21(H)--20(H)    | 0.24493        | -0.88365               | 1.00000 | 0.74372           |
|                   | 15(H)--1(Mg)    | 0.00298        | 0.00660                | 0.01847 | 3.13957           |
|                   | 5(H)--1(Mg)     | 0.00302        | 0.00666                | 0.01893 | 3.13385           |
|                   | 3(H)--1(Mg)     | 0.00299        | 0.00663                | 0.01858 | 3.13708           |
|                   | 19(H)--18(H)    | 0.24499        | -0.88408               | 1.00000 | 0.74372           |
|                   | 9(H)--1(Mg)     | 0.05170        | 0.19640                | 0.13142 | 1.71442           |
|                   | 1(Mg)--17(H)    | 0.00294        | 0.00652                | 0.01822 | 3.15022           |
|                   | 1(Mg)--11(H)    | 0.05168        | 0.19614                | 0.13152 | 1.71464           |
|                   | 1(Mg)--12(H)    | 0.00292        | 0.00651                | 0.01803 | 3.15194           |
|                   | 17(H)--12(H)    | 0.24407        | -0.87824               | 1.00000 | 0.7453            |
|                   | 1(Mg)--7(H)     | 0.00293        | 0.00650                | 0.01810 | 3.15315           |
|                   | 1(Mg)--14(H)    | 0.00291        | 0.00648                | 0.01788 | 3.1551            |
|                   | 7(H)--14(H)     | 0.24408        | -0.87828               | 1.00000 | 0.74529           |
|                   | 1(Mg)--8(H)     | 0.00291        | 0.00646                | 0.01792 | 3.15879           |
|                   | 1(Mg)--2(H)     | 0.00287        | 0.00642                | 0.01756 | 3.16228           |
|                   | 8(H)--2(H)      | 0.24409        | -0.87839               | 1.00000 | 0.74526           |
| 6(H)--4(H)        | 0.24499         | -0.88406       | 1.00000                | 0.74372 |                   |

Bader proposed one kind of topology analysis technique to study electron density in “Atom-in-Molecular” (AIM) theory [S11]. The Multiwfn software makes it easy to perform calculations such as electron density ( $\rho$ ), Laplacian of electron density ( $\nabla^2\rho$ ) [S12] and electron localization function (ELF) [S13] on cluster bond critical points (BCPs), which can help us to study the nature of chemical bonds. According to the bond critical point topology property, the strength of the same chemical bond can be

compared by the magnitude of the electron density  $\rho$ , i.e. the higher the value of  $\rho$ , the stronger the bond.  $\nabla^2\rho(\text{BCP})$  is a useful criterion for the type of chemical bond. When it is greater than 0, it means that the chemical bonding is in the form of non-covalent bonds, sometimes called closed-shell interactions, while the corresponding ELF value will be less than 0.5. And when it is less than zero, the corresponding chemical bonds are generally covalent bonds, and the ELF value will be greater than 0.5 at this time.

#### Reference

- [S11] Bader, Richard FW. "Atoms in molecules." *Accounts of Chemical Research* 18.1 (1985): 9-15.
- [S12] Lu, Tian, and Feiwu Chen. "Bond order analysis based on the Laplacian of electron density in fuzzy overlap space." *The Journal of Physical Chemistry A* 117.14 (2013): 3100-3108.
- [S13] Becke, Axel D., and Kenneth E. Edgecombe. "A simple measure of electron localization in atomic and molecular systems." *The Journal of chemical physics* 92.9 (1990): 5397-5403.

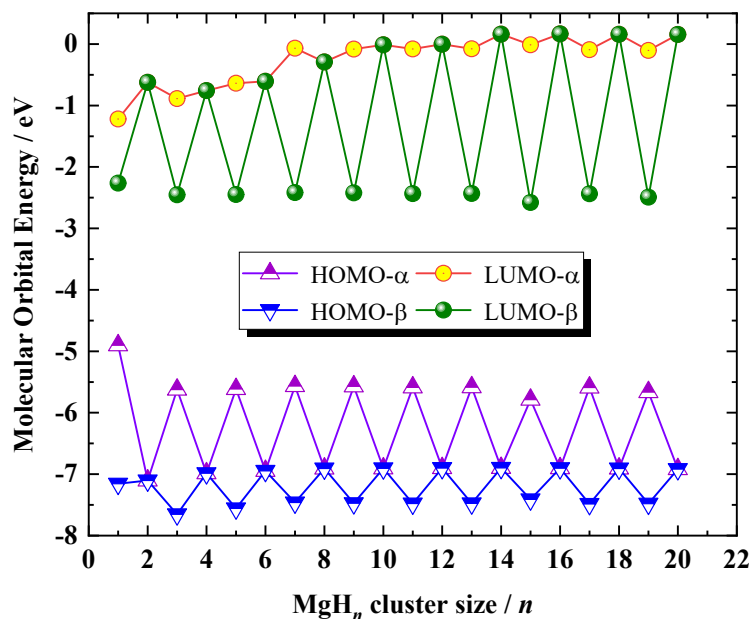

Figure S1. HOMO and LUMO molecular orbital energy of MgH<sub>n</sub> (n=1-2) clusters.

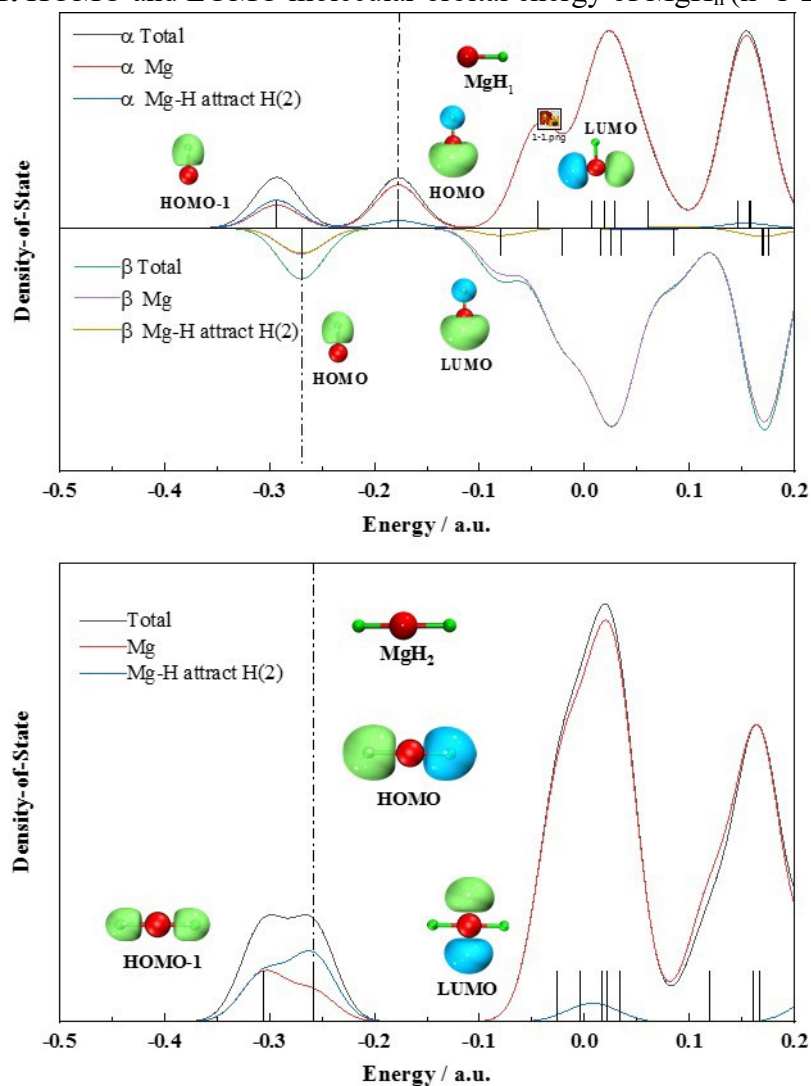

Figure S2-1. TDOS, PDOS and mol MOs diagram of MgH<sub>n</sub> (n=1-2) clusters.

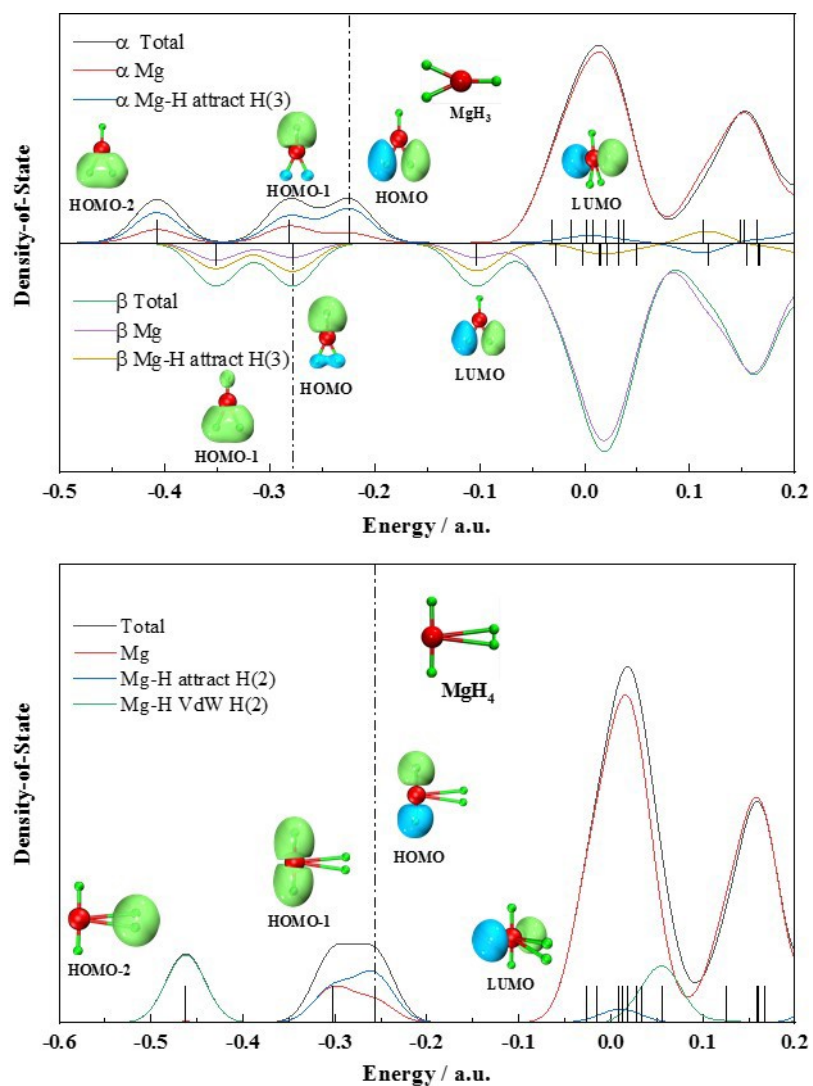

Figure S2-2. TDOS, PDOS and mol MOs diagram of MgH<sub>n</sub> (n=3-4) clusters.

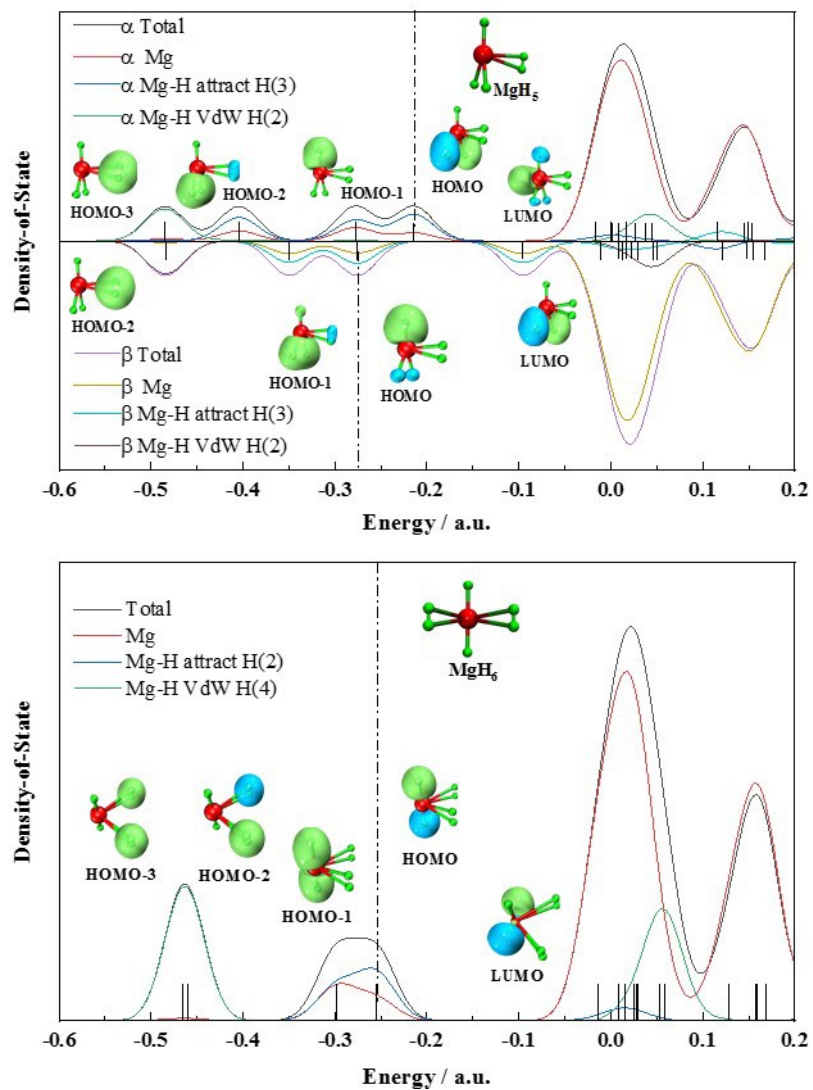

Figure S2-3. TDOS, PDOS and mol MOs diagram of MgH<sub>n</sub> (n=5-6) clusters.



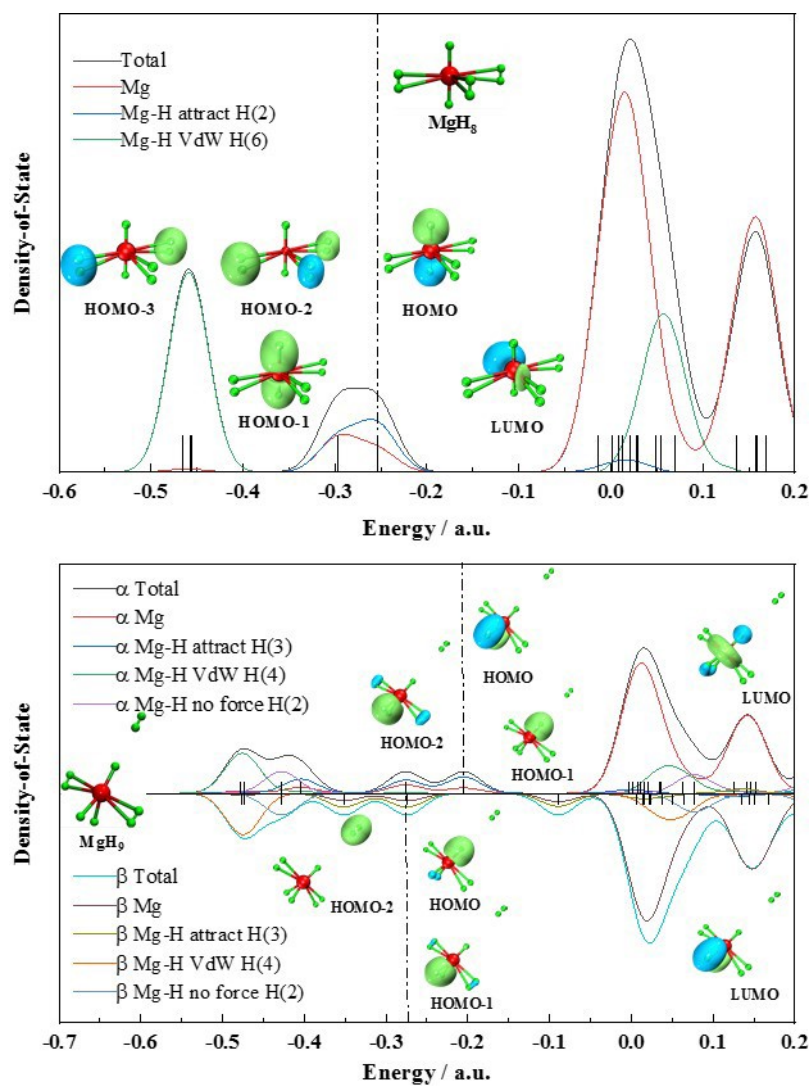

Figure S2-4. TDOS, PDOS and mol MOs diagram of MgH<sub>n</sub> (n=8-9) clusters.

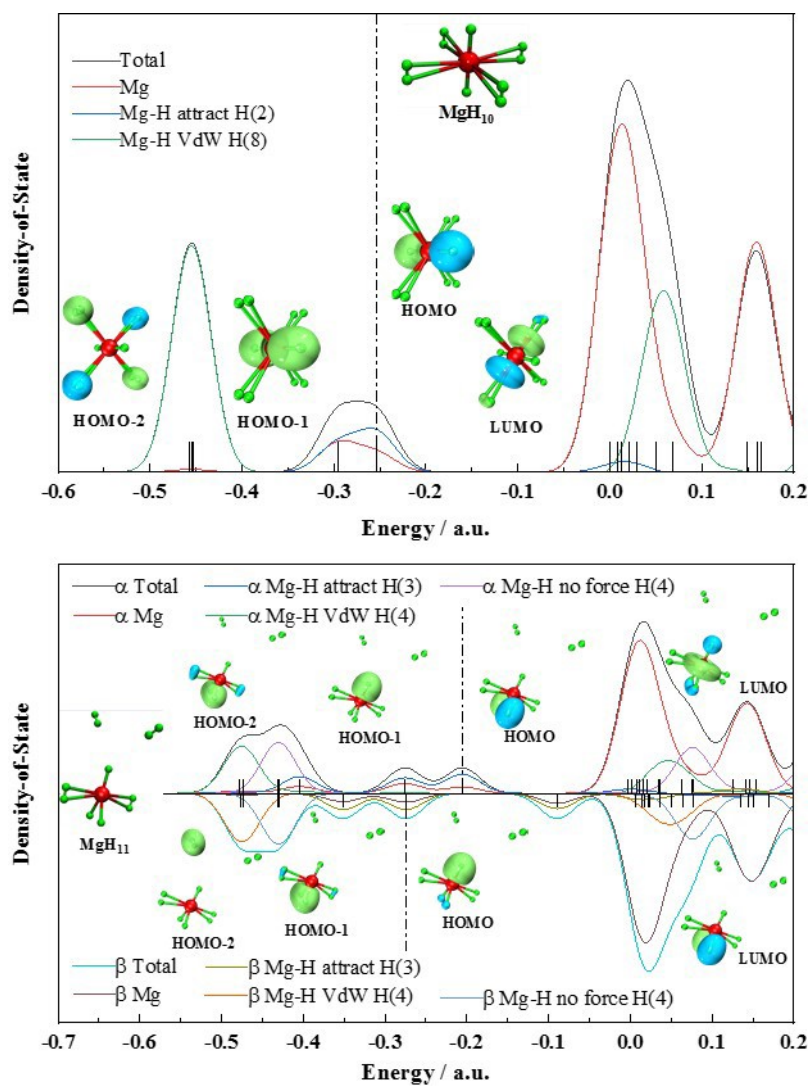

Figure S2-5. TDOS, PDOS and mol MOs diagram of MgH<sub>n</sub> (n=10-11) clusters.

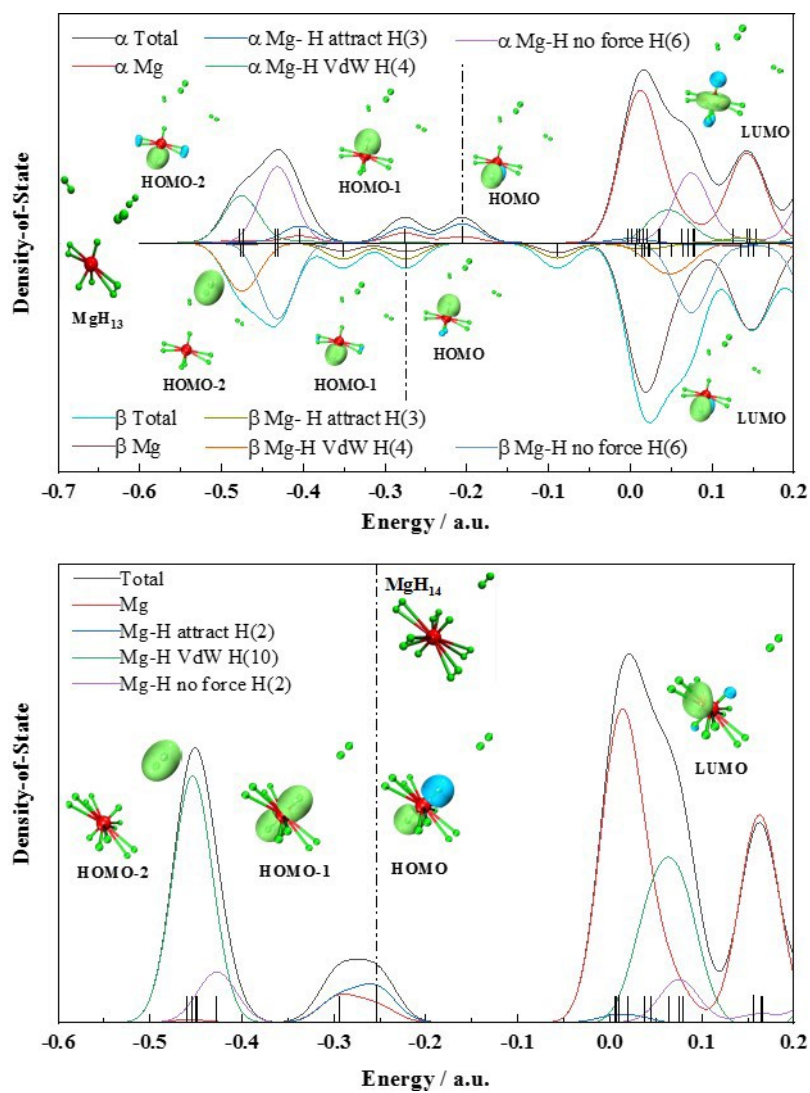

Figure S2-6. TDOS, PDOS and mol MOs diagram of MgH<sub>n</sub> (n=13-14) clusters.

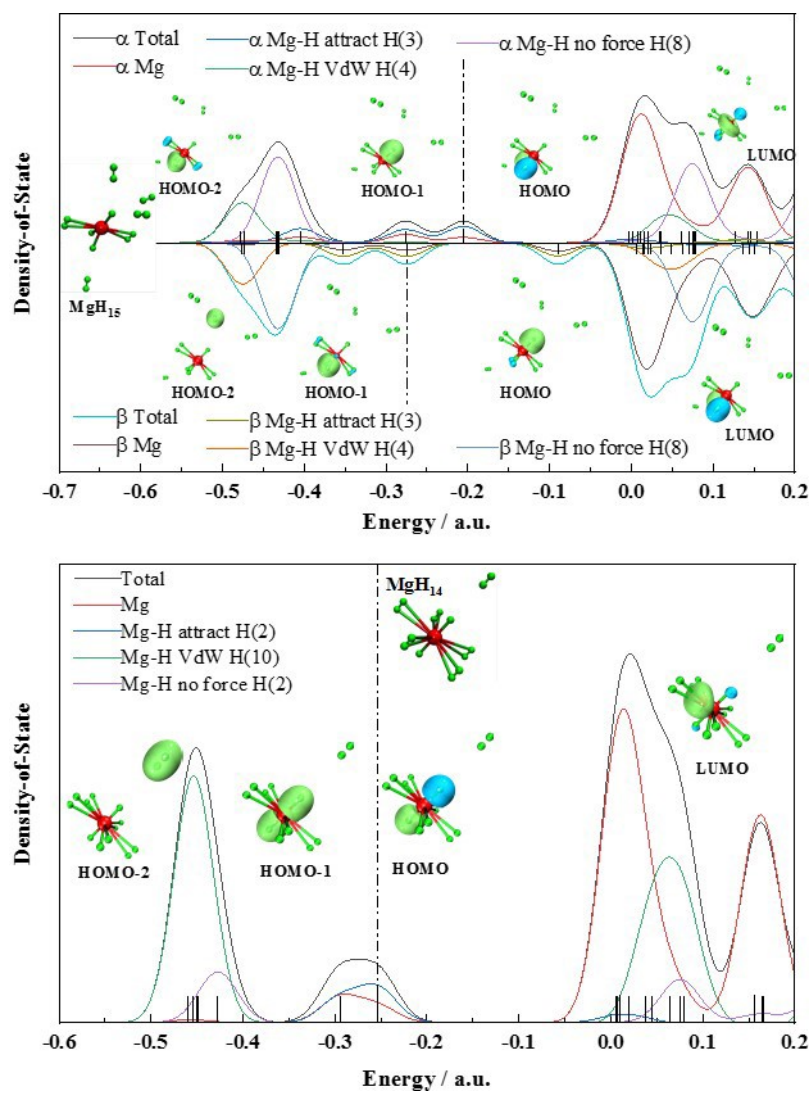

Figure S2-7. TDOS, PDOS and mol MOs diagram of MgH<sub>n</sub> (n=15-16) clusters.

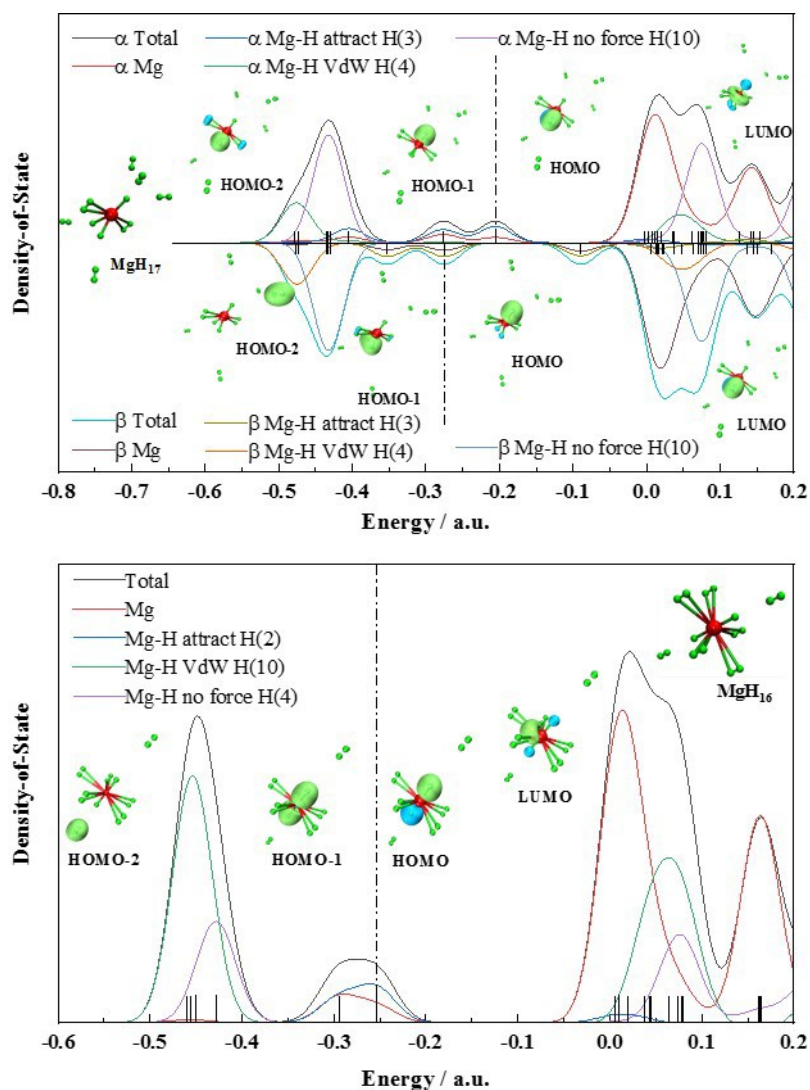

Figure S2-8. TDOS, PDOS and mol MOs diagram of MgH<sub>n</sub> (n=17-18) clusters.

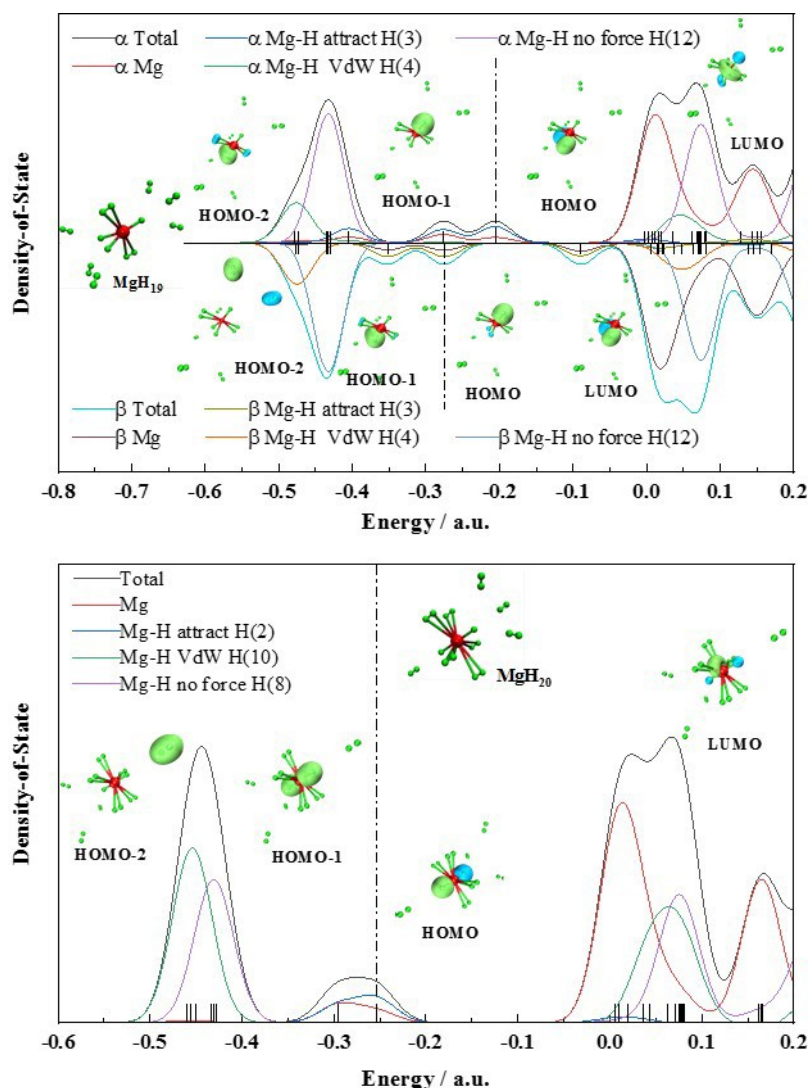

**Figure S2-9.** TDOS, PDOS and mol MOs diagram of  $\text{MgH}_n$  ( $n=19-20$ ) clusters.

The density of states (DOS) of a cluster system is different from that of a periodic system. Because clusters are isolated systems with no  $k$ -point concept, their states are often referred to molecular orbitals and therefore the calculated orbital energy levels are discrete. By using Gaussian-type Gaussian functions in Multiwfn software to broaden the discrete orbital energies, the orbital energies of the clusters can be transformed into smooth continuous DOS curves, which are usually defined as total density of states (TDOS). Because the TDOS is derived from the contributions of all orbitals of all atoms, it is easy to break it down into several partial contributions to be studied separately, which is the motivation for the partial density of states (PDOS) introduced in the paper. Since this work discusses clusters of Mg adsorbing multiple H atoms, the study suggests that there are three possibilities for Mg-H interactions,

namely strong Mg-H attraction, weakly interacting Mg-H adsorption, and no significant Mg-H interactions. Therefore, in our work we define each  $\text{MgH}_n$  into four parts, namely the Mg atom, the H atom with a strong attraction to the Mg atom, the H atom with a weak interaction with the Mg atom (van der Waals), and the H atom with no interaction with the Mg atom [S14]. All molecular orbital maps in this work were made with VMD software [S15].

## Reference

[S14] Specific TDOS and PDOS plot operations can be found in section 4.10.1 of the Multiwfn manual, which can be download directly online in the following website, [http://sobereva.com/multiwfn/misc/Multiwfn\\_3.8\\_dev.pdf](http://sobereva.com/multiwfn/misc/Multiwfn_3.8_dev.pdf).

[S15] Humphrey, William, Andrew Dalke, and Klaus Schulten. "VMD: visual molecular dynamics." *Journal of molecular graphics* 14.1 (1996): 33-38.



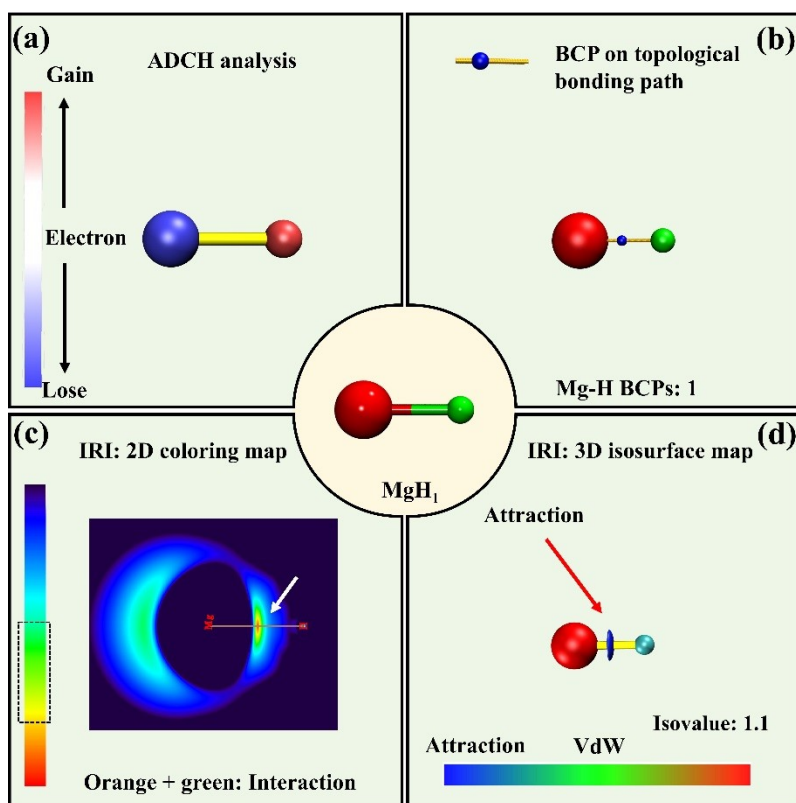

Figure S3-1. ADCH, BCP, IRI-2D and IRI-3D analysis for  $\text{MgH}_1$  cluster.

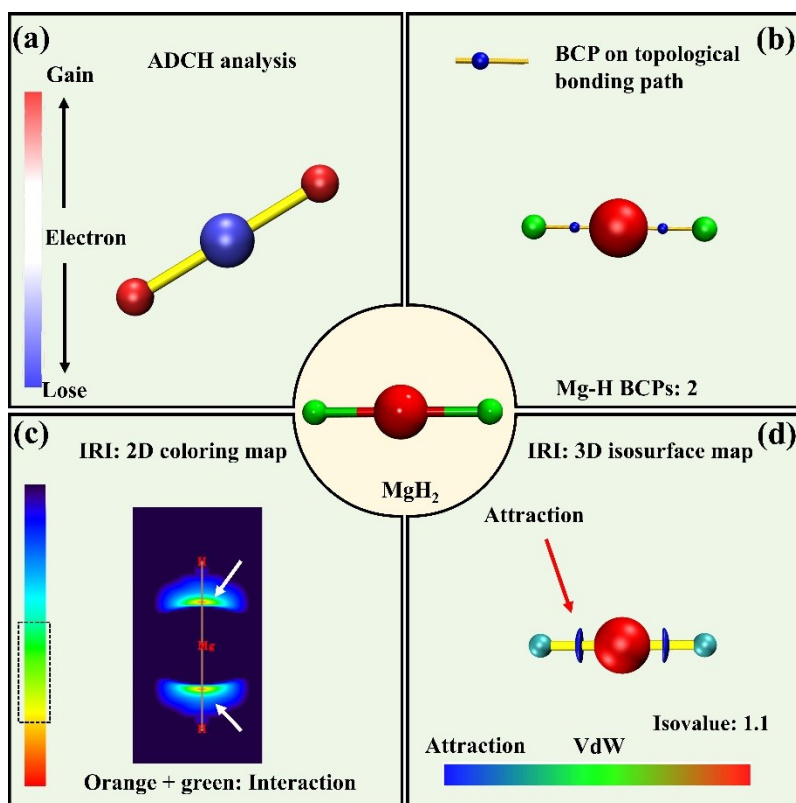

Figure S3-2. ADCH, BCP, IRI-2D and IRI-3D analysis for  $\text{MgH}_2$  cluster.



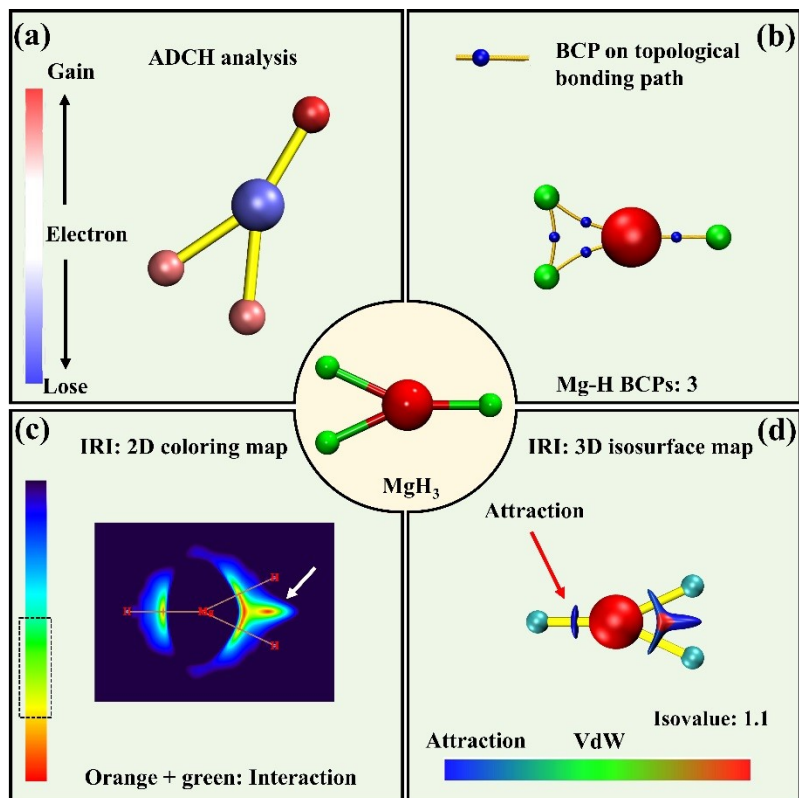

Figure S3-3. ADCH, BCP, IRI-2D and IRI-3D analysis for  $\text{MgH}_3$  cluster.

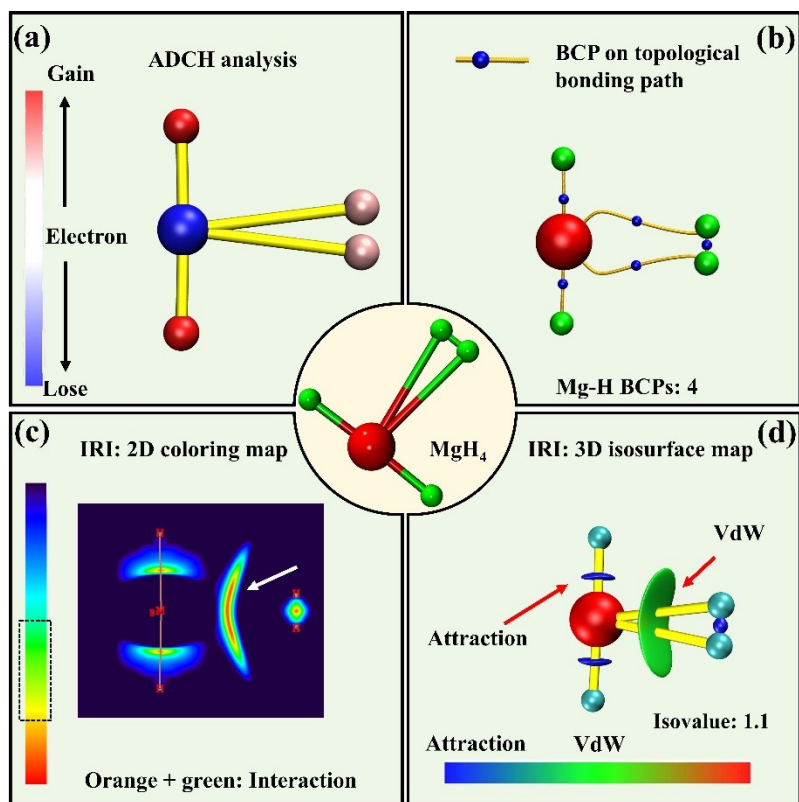

Figure S3-4. ADCH, BCP, IRI-2D and IRI-3D analysis for  $\text{MgH}_4$  cluster.

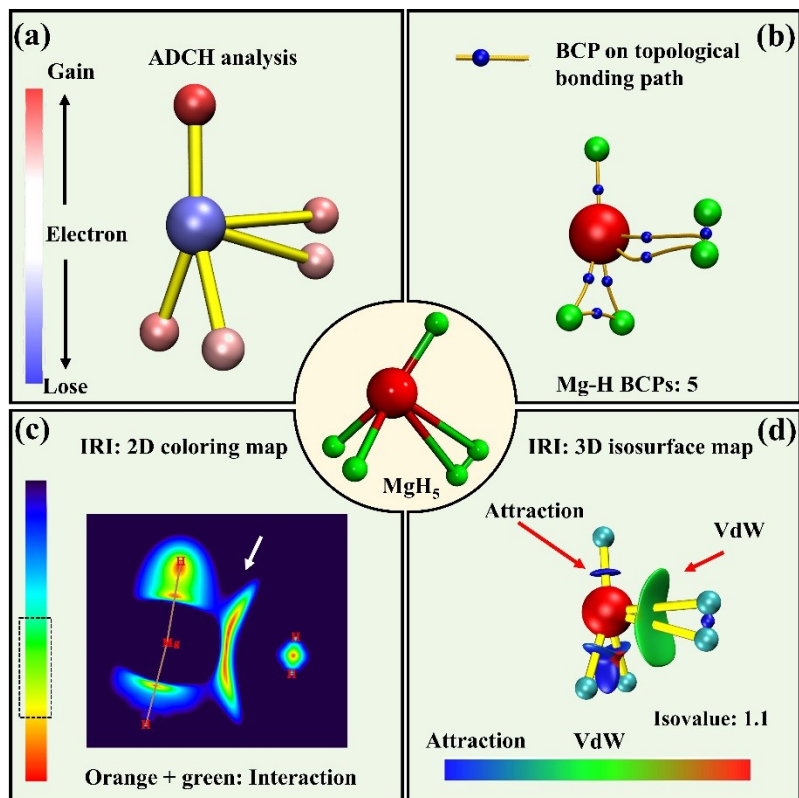

Figure S3-5. ADCH, BCP, IRI-2D and IRI-3D analysis for  $\text{MgH}_5$  cluster.

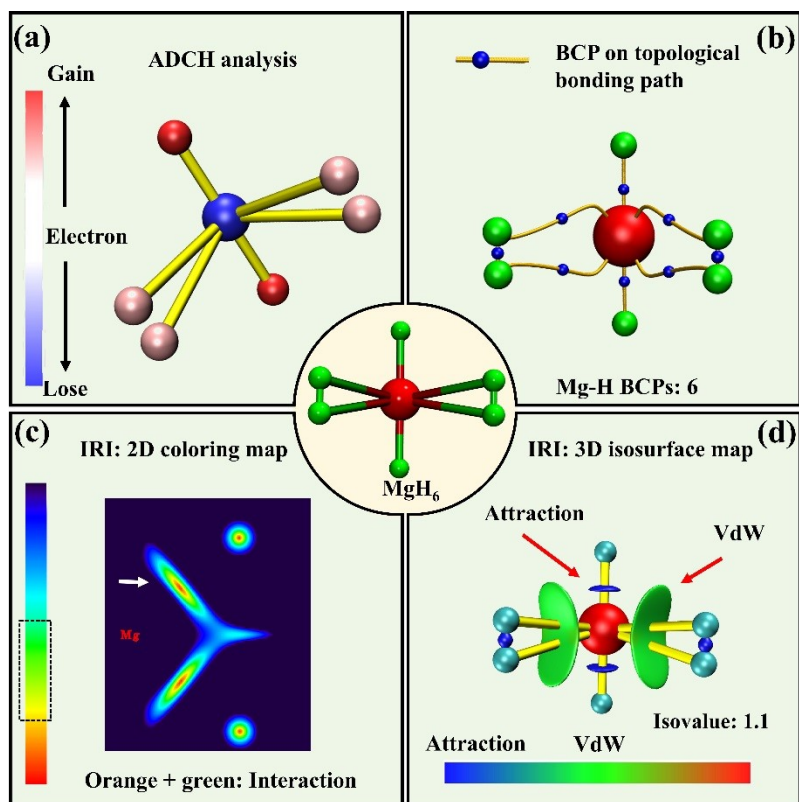

Figure S3-6. ADCH, BCP, IRI-2D and IRI-3D analysis for  $\text{MgH}_6$  cluster.

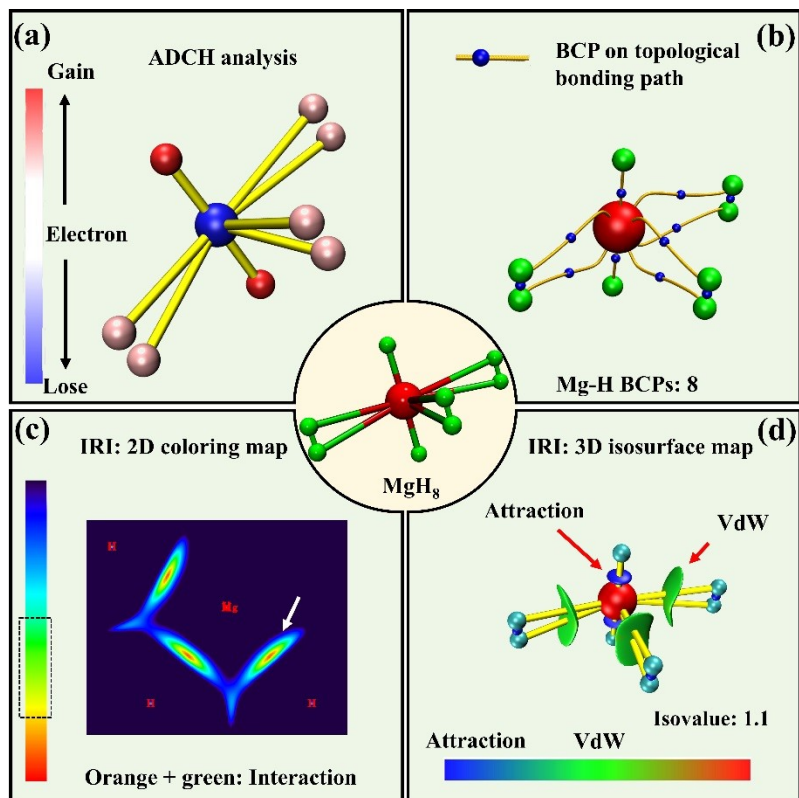

Figure S3-7. ADCH, BCP, IRI-2D and IRI-3D analysis for  $\text{MgH}_8$  cluster.

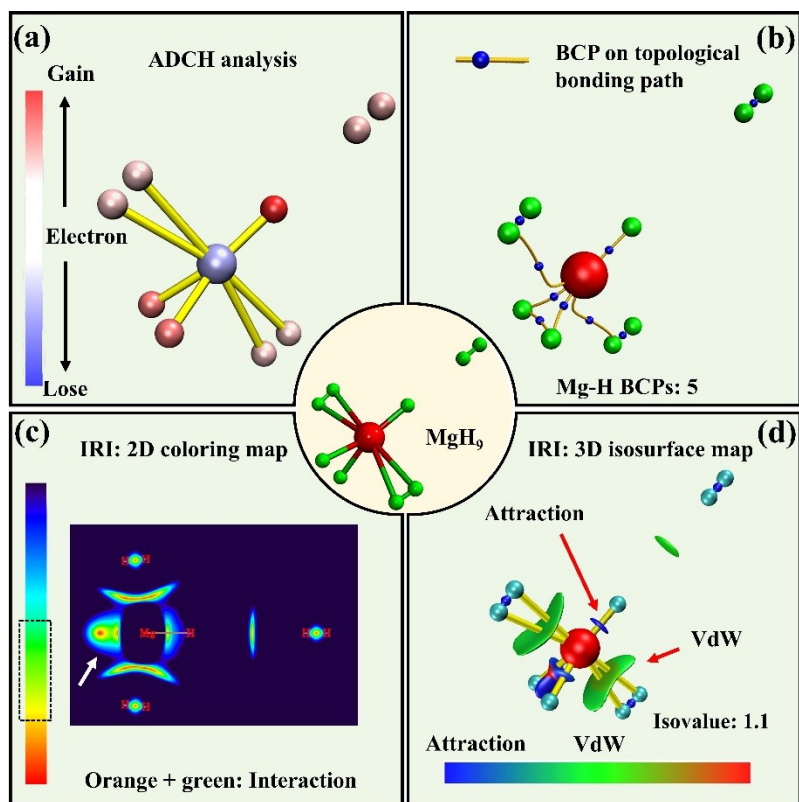

Figure S3-8. ADCH, BCP, IRI-2D and IRI-3D analysis for  $\text{MgH}_9$  cluster.

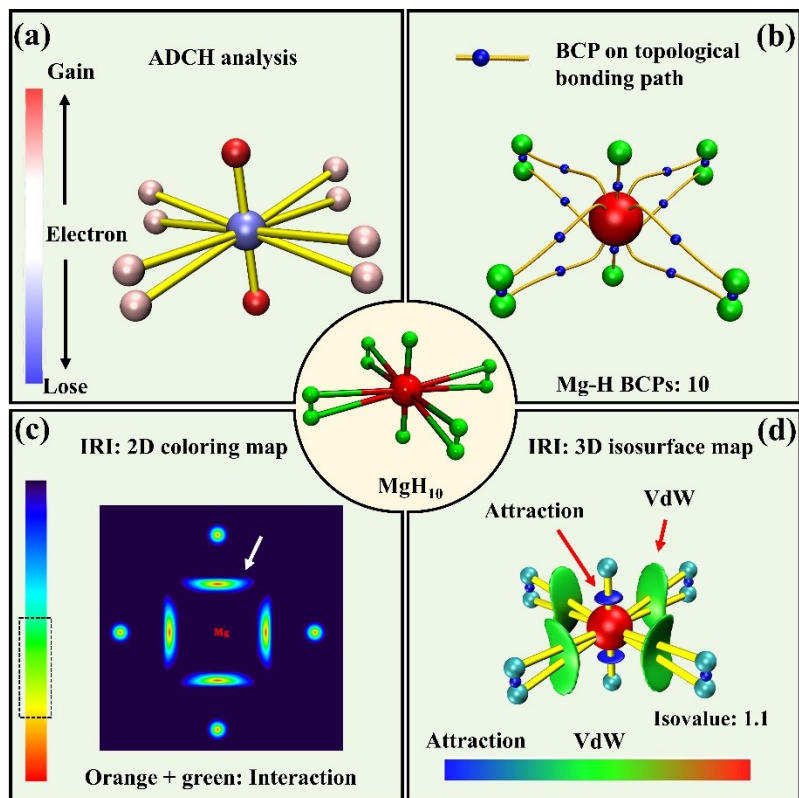

Figure S3-9. ADCH, BCP, IRI-2D and IRI-3D analysis for  $\text{MgH}_{10}$  cluster.

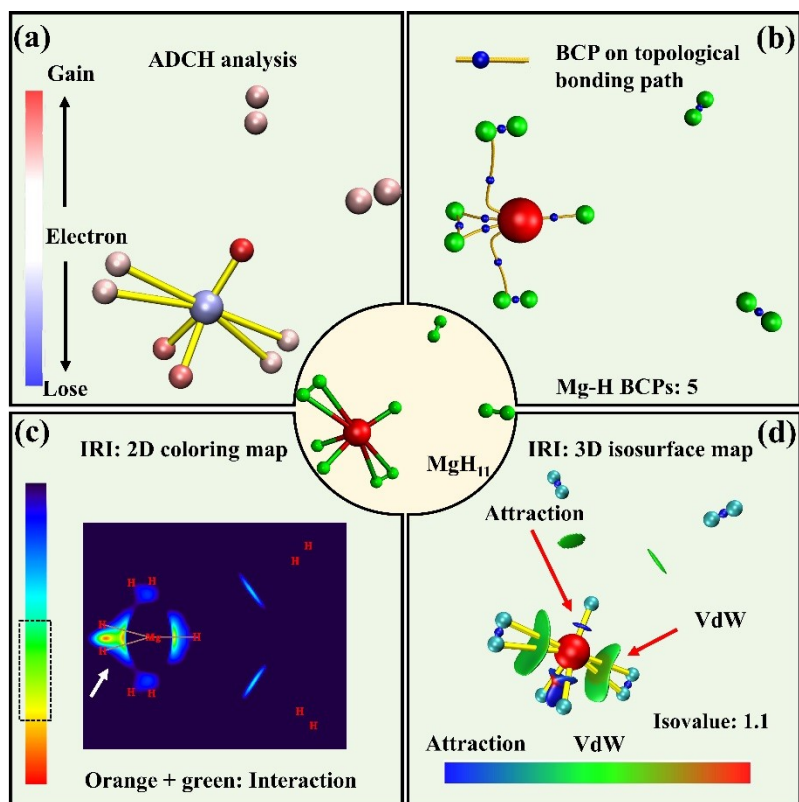

Figure S3-10. ADCH, BCP, IRI-2D and IRI-3D analysis for  $\text{MgH}_{11}$  cluster.

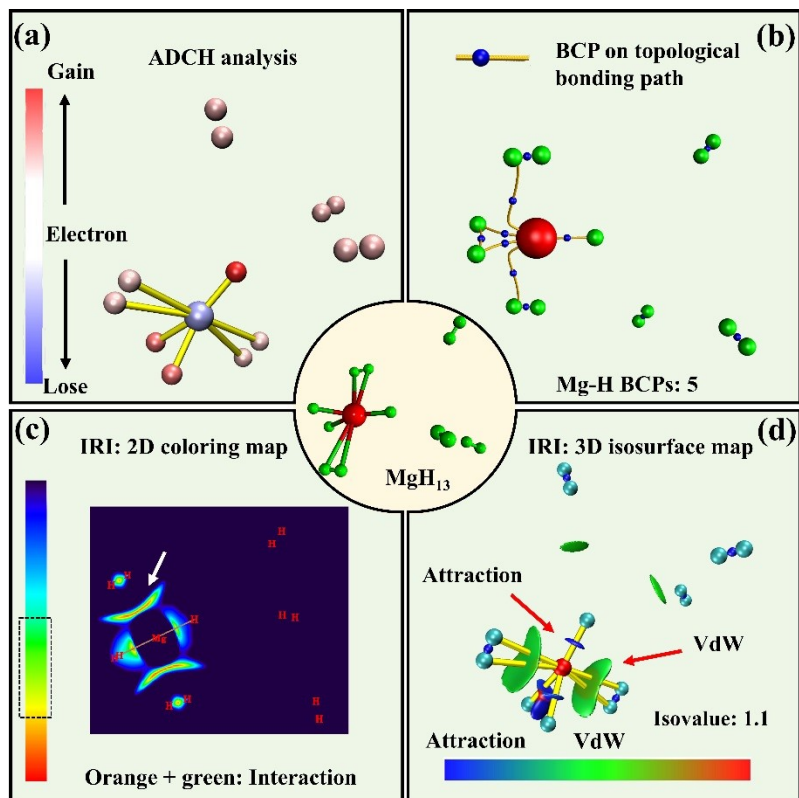

Figure S3-11. ADCH, BCP, IRI-2D and IRI-3D analysis for  $\text{MgH}_{13}$  cluster.

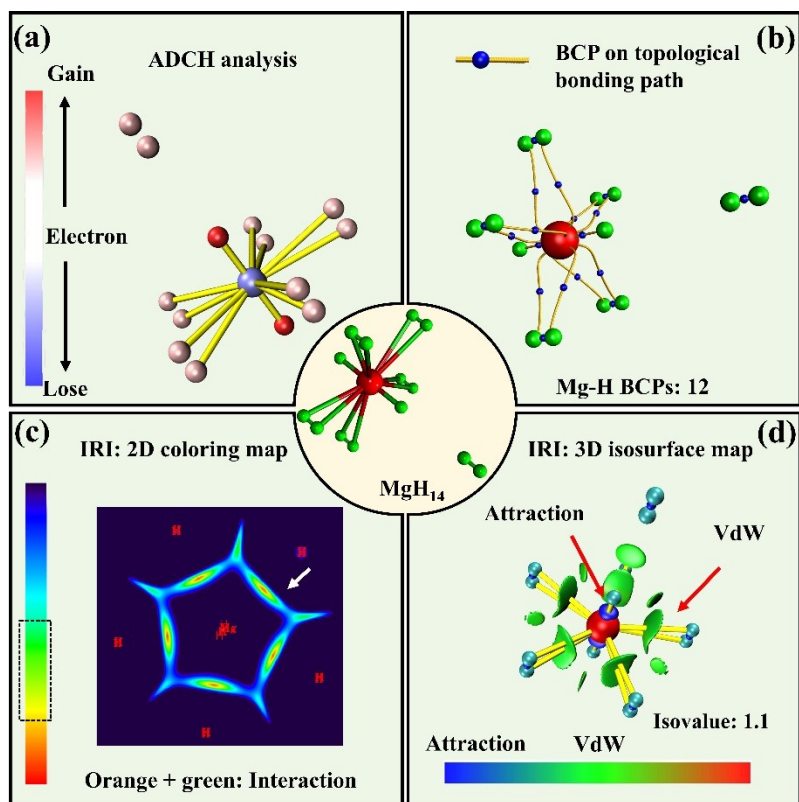

Figure S3-12. ADCH, BCP, IRI-2D and IRI-3D analysis for  $\text{MgH}_{14}$  cluster.



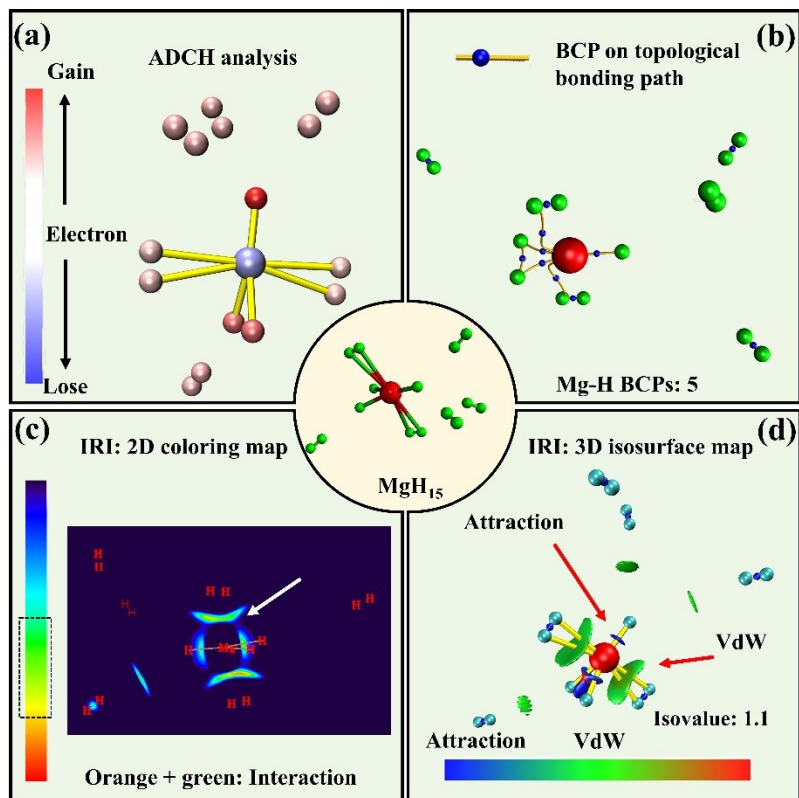

Figure S3-13. ADCH, BCP, IRI-2D and IRI-3D analysis for  $\text{MgH}_{15}$  cluster.

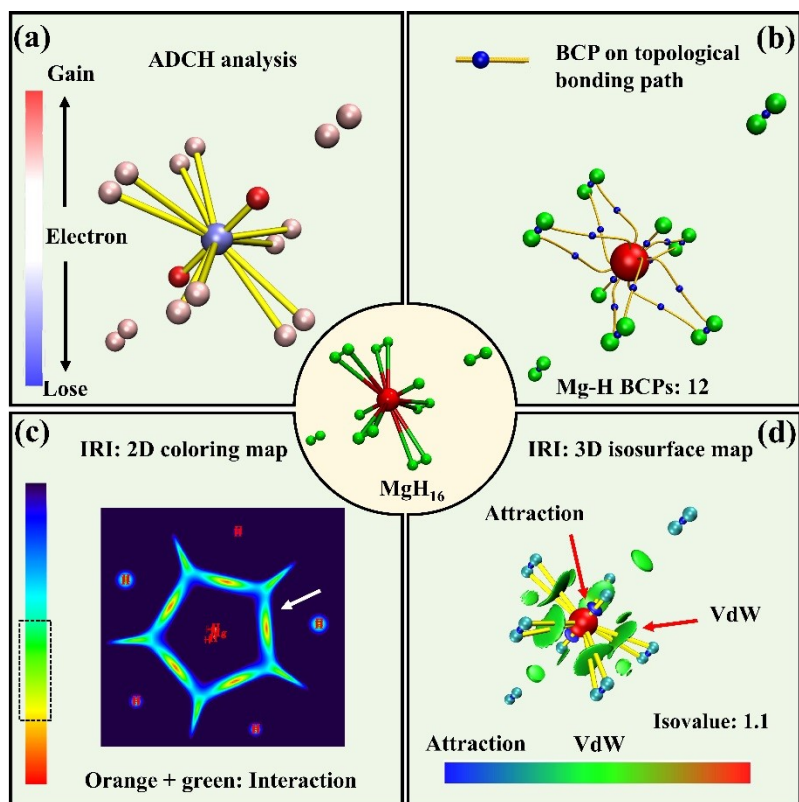

Figure S-14. ADCH, BCP, IRI-2D and IRI-3D analysis for  $\text{MgH}_{16}$  cluster.

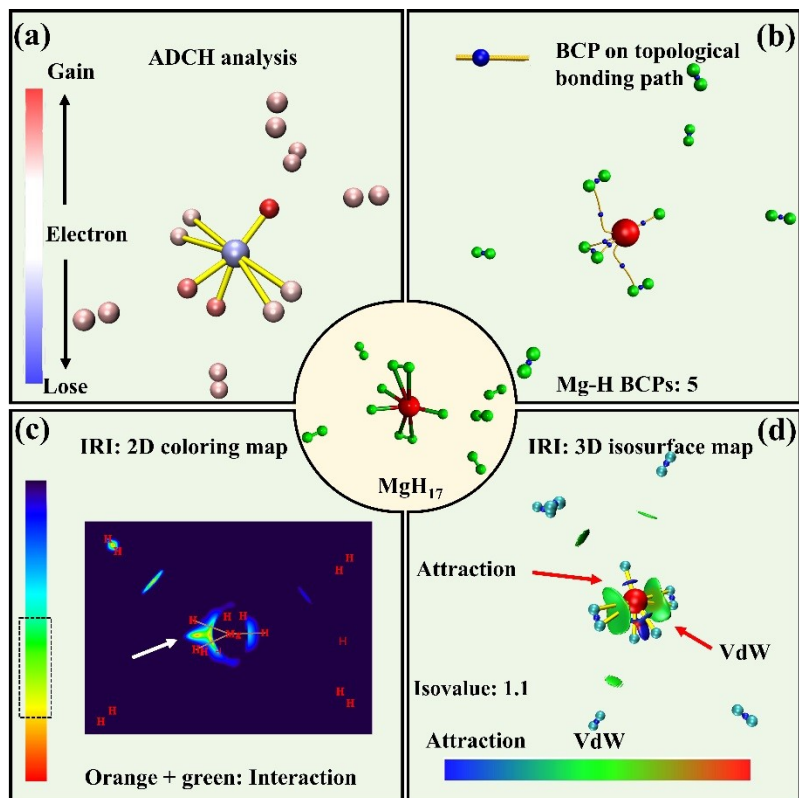

Figure S3-15. ADCH, BCP, IRI-2D and IRI-3D analysis for  $\text{MgH}_{17}$  cluster.

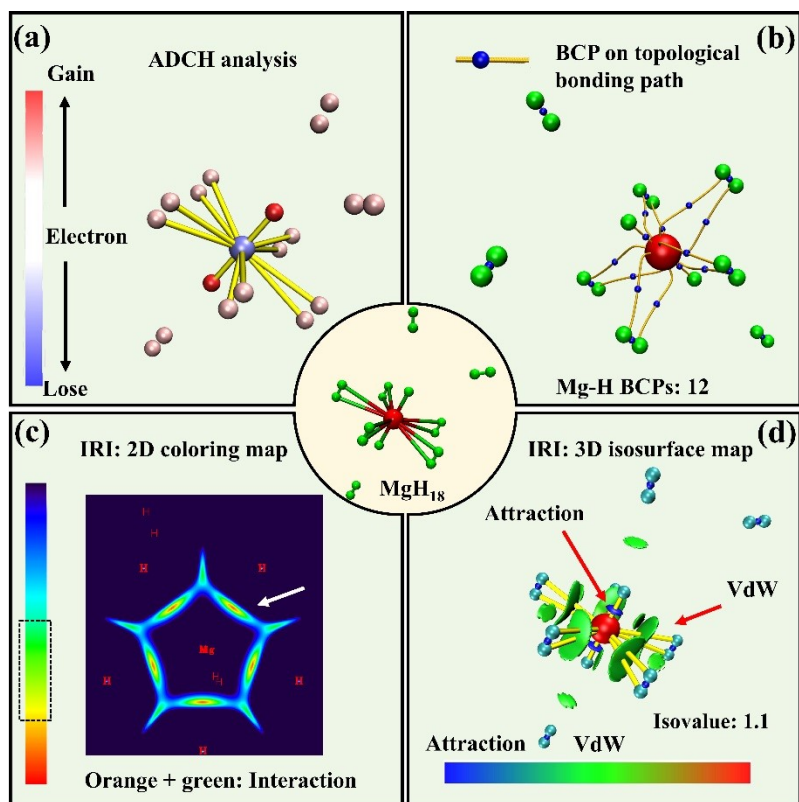

Figure S3-16. ADCH, BCP, IRI-2D and IRI-3D analysis for  $\text{MgH}_{18}$  cluster.

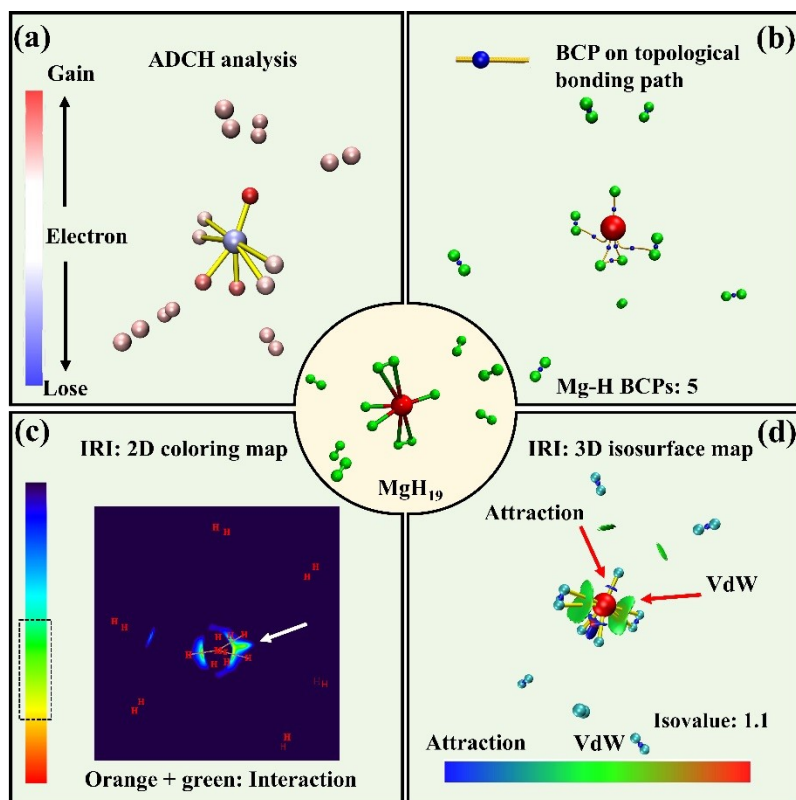

Figure S3-17. ADCH, BCP, IRI-2D and IRI-3D analysis for  $\text{MgH}_{19}$  cluster.

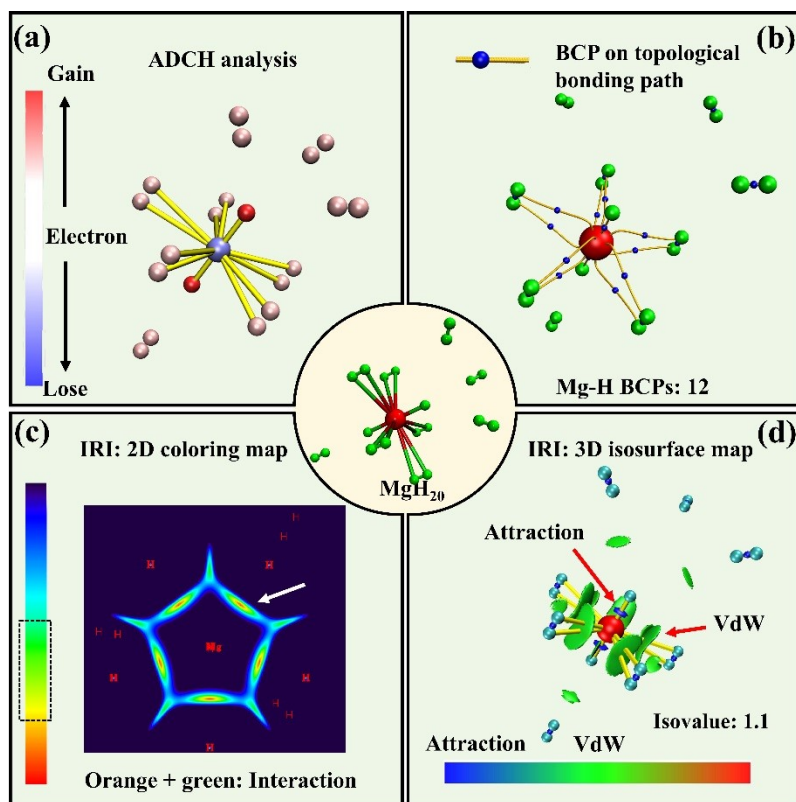

Figure S3-18. ADCH, BCP, IRI-2D and IRI-3D analysis for  $\text{MgH}_{20}$  cluster.



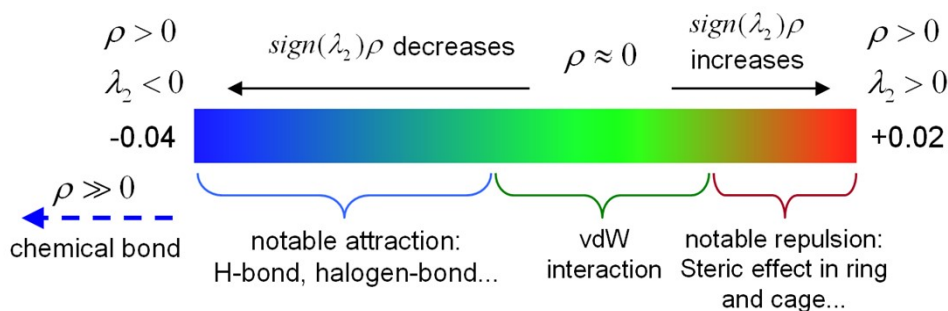

**Figure S3-19.** Illustration of IRI cooler-correspondence interactions

Figures 6(b), 7(b) in main text and Figures S3(b) show the BCPs bonding path [S16], which can be obtained through Multiwfn software together with VMD software. As shown in Figures 6(c-d), 7(c-d) in main text, and Figure S3 (c-d), We calculated and plotted the bonded and weakly interacting regions of the clusters using the Interaction region indicator (IRI) method [S17]. The key work of IRI is to distinguish the strength and character of the action of different regions by projecting the  $\text{sign}(\lambda_2)\rho$  function onto the IRI equivalent surface in different colors, where  $\lambda_2$  represents the second largest eigenvalue of the electron density Hessian matrix,  $\text{sign}(\lambda_2)$  stands for taking the sign and  $\rho$  is the electron density. As displayed in **Figure S3-19**, the green color on the IRI equivalent surface indicates that this is a region of van der Waals interaction, or very weak dispersion-dominated hydrogen bonding, which is the force that allows some  $\text{H}_2$  molecules to form relatively stable clusters despite the apparent absence of Mg atomic interactions.

The absence of red for all when IRI values in this study indicates that there is no site-blocking interaction in the  $\text{MgH}_n$  clusters. If the isosurface color is significantly blue, it means a significant attractive interaction, and if the isosurface is completely blue, it indicates either a relatively strong weak interaction here, so that the electron density ( $\rho$ ) in the interaction region can reach  $\rho \geq 0.04$  a.u., or a chemical bonding interaction, where the electron density in the bonding region is usually significantly greater than  $\rho \gg 0.04$  a.u. There are three electron densities for BCPs in Figure S5,  $\rho(\text{BCP}) \sim 0.2$  for H-H of  $\text{H}_2$  molecules away from the Mg atom, and the blue region of H-H in Figure S3 for bonding. Some of the Mg-H in the odd and even  $\text{MgH}_n$  clusters have  $\rho(\text{BCP}) \sim 0.04$ , with  $\text{ELF} < 0.5$  indicating apparent attractive interactions, while

some other Mg-H are apparent f van der Waals interactions, which have  $\rho(\text{BCP}) \sim 0.003$ . The above findings suggest that the two Mg-H, attractive bonding and VdW interactions defined in this study, and H-H bonding in  $\text{H}_2$  molecules can indeed be confirmed by IRI-2D and IRI-3D [S18].

## Reference

- [S16] Specific BCPs bonding path search and plot can be found in section 4.2.1 of the Multiwfn manual, which can be directly download online in the following website, [http://sobereva.com/multiwfn/misc/Multiwfn\\_3.8\\_dev.pdf](http://sobereva.com/multiwfn/misc/Multiwfn_3.8_dev.pdf).
- [S17] Lu, Tian, and Qinxue Chen. "Interaction region indicator: A simple real space function clearly revealing both chemical bonds and weak interactions." *Chemistry - Methods* 1.5 (2021): 231-239.
- [S18] Specific IRI plot operations can be found in section 4.20.4 of the Multiwfn manual, which can be directly download online in the following website, [http://sobereva.com/multiwfn/misc/Multiwfn\\_3.8\\_dev.pdf](http://sobereva.com/multiwfn/misc/Multiwfn_3.8_dev.pdf).
